# Supplementary material for: What controls the magnetic anisotropy in heptacoordinate high-spin cobalt(ii) complexes? A theoretical perspective
Source: Royal Society of Chemistry journal article supplement (doi:10.1039/d1dt03903b), 2022-01-01
Supplement: d1dt03903b1.pdf [file d1dt03903b1.pdf]

# Electronic Supporting Information

## What Controls the Magnetic Anisotropy in Heptacoordinate High-Spin

### Cobalt(II) Complexes? A Theoretical Perspective

Peter Comba<sup>1\*</sup>, Gopalan Rajaraman<sup>2\*</sup>, Arup Sarkar<sup>2</sup> and Gunasekaran Velmurugan<sup>1</sup>

<sup>1</sup>Heidelberg University, Institute of Inorganic Chemistry and Interdisciplinary Center for Scientific Computing, Im Neuenheimer Feld 270, 69120 Heidelberg, Germany. E-mail:

[peter.comba@aci.uni-heidelberg.de](mailto:peter.comba@aci.uni-heidelberg.de)

<sup>2</sup>Department of Chemistry, Indian Institute of Technology Bombay, Powai, Mumbai, 400076, India. E-mail: [rajaraman@chem.iitb.ac.in](mailto:rajaraman@chem.iitb.ac.in)

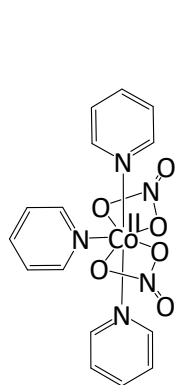

[Co(py)<sub>3</sub>(NO<sub>3</sub>)<sub>2</sub>] (1)

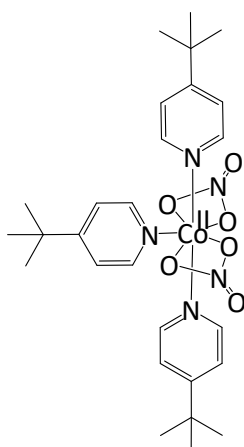

[Co(tbp)<sub>3</sub>(NO<sub>3</sub>)<sub>2</sub>] (2)

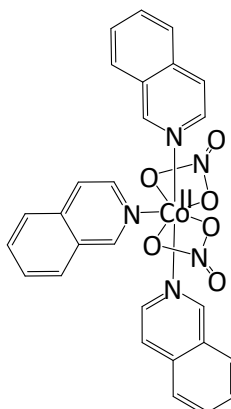

[Co(isq)<sub>3</sub>(NO<sub>3</sub>)<sub>2</sub>] (3)

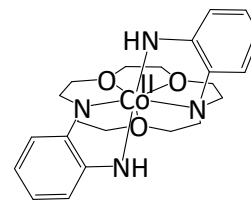

[Co(L<sub>1</sub>)]<sup>2+</sup> (4)

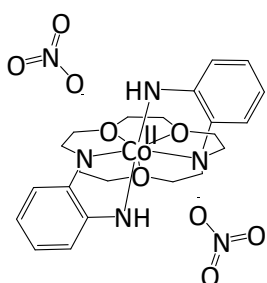

[Co(L<sub>1</sub>).2NO<sub>3</sub>] (5)

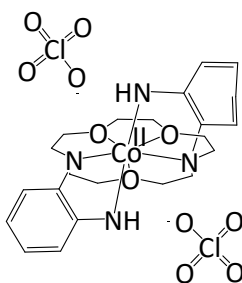

[Co(L<sub>1</sub>).2ClO<sub>4</sub>] (6)

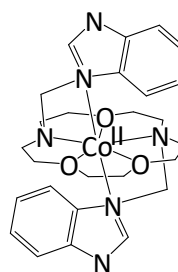

[Co(L<sub>2</sub>)]<sup>2+</sup> (7)

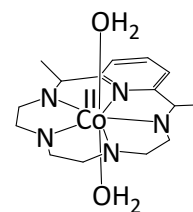

[Co(L<sub>3</sub>)(H<sub>2</sub>O)<sub>2</sub>]<sup>2+</sup> (8)

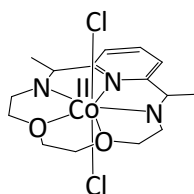

[Co(L<sub>4</sub>)Cl<sub>2</sub>] (9)

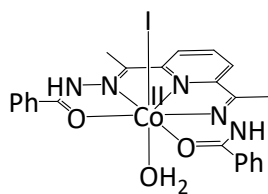

[Co(L<sub>5</sub>H<sub>2</sub>)I(H<sub>2</sub>O)] (10)

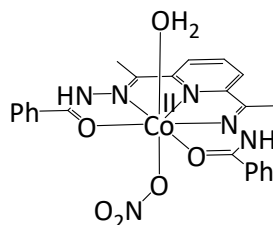

[Co(L<sub>5</sub>H<sub>2</sub>)(H<sub>2</sub>O)(NO<sub>3</sub>)] (11)

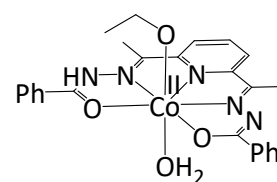

[Co(L<sub>5</sub>H)(H<sub>2</sub>O)(EtOH)]<sup>+</sup> (12)

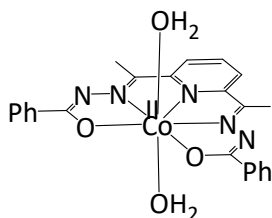

[Co(L<sub>5</sub>)(H<sub>2</sub>O)] (13)

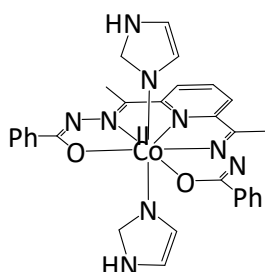

[Co(L<sub>5</sub>)(im)<sub>2</sub>] (14)

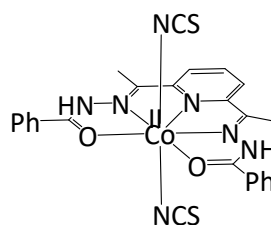

[Co(L<sub>5</sub>H<sub>2</sub>)(NCS)<sub>2</sub>] (15)

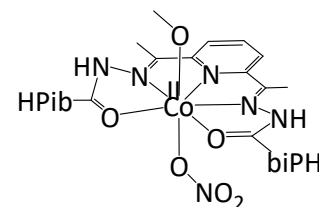

[Co(NO<sub>3</sub>)(EtOH)]<sup>+</sup> (16)

**Scheme S1.** Structural formula of the chosen heptacoordinate high-spin Co<sup>II</sup> complexes;

**Table S1.** SHAPE parameter of the investigated seven coordinate complexes.

| Complex                                                                       | JETPY<br>(C <sub>3v</sub> ) | JPBPY<br>(D <sub>5h</sub> ) | CTPR<br>(C <sub>2v</sub> ) | COC<br>(C <sub>3v</sub> ) | PBPY<br>(D <sub>5h</sub> ) | HPY<br>(C <sub>6v</sub> ) | HP<br>(D <sub>7h</sub> ) |
|-------------------------------------------------------------------------------|-----------------------------|-----------------------------|----------------------------|---------------------------|----------------------------|---------------------------|--------------------------|
| [Co(py) <sub>3</sub> (NO <sub>3</sub> ) <sub>2</sub> ] (1)                    | 23.24                       | 4.37                        | 6.31                       | 8.32                      | 1.45                       | 23.94                     | 32.49                    |
| [Co(tbp) <sub>3</sub> (NO <sub>3</sub> ) <sub>2</sub> ] (2)                   | 22.35                       | 4.52                        | 6.79                       | 8.22                      | 1.41                       | 24.56                     | 33.24                    |
| [Co(isq) <sub>3</sub> (NO <sub>3</sub> ) <sub>2</sub> ] (3)                   | 22.28                       | 4.69                        | 6.59                       | 8.25                      | 1.54                       | 22.96                     | 32.27                    |
| [Co(L <sub>1</sub> )] <sup>2+</sup> (4)                                       | 22.10                       | 3.80                        | 4.92                       | 6.42                      | 0.55                       | 25.48                     | 33.65                    |
| [Co(L <sub>1</sub> )]·2NO <sub>3</sub> (5)                                    | 22.10                       | 3.80                        | 4.92                       | 6.42                      | 0.55                       | 25.48                     | 33.65                    |
| [Co(L <sub>1</sub> )]·2ClO <sub>4</sub> (6)                                   | 22.10                       | 3.80                        | 4.92                       | 6.42                      | 0.55                       | 25.48                     | 33.65                    |
| [Co(L <sub>2</sub> )] <sup>2+</sup> (7)                                       | 19.74                       | 3.46                        | 5.24                       | 6.76                      | 1.10                       | 23.42                     | 28.81                    |
| [Co(L <sub>3</sub> )(H <sub>2</sub> O) <sub>2</sub> ] <sup>2+</sup> (8)       | 22.68                       | 3.50                        | 4.92                       | 6.46                      | 0.29                       | 24.66                     | 33.80                    |
| [Co(L <sub>4</sub> )Cl <sub>2</sub> ] (9)                                     | 23.94                       | 5.74                        | 5.07                       | 6.58                      | 0.50                       | 25.38                     | 35.64                    |
| [Co(L <sub>5</sub> H <sub>2</sub> )I(H <sub>2</sub> O)] (10)                  | 24.61                       | 6.52                        | 6.89                       | 8.48                      | 1.01                       | 25.45                     | 34.34                    |
| [Co(L <sub>5</sub> H <sub>2</sub> )(H <sub>2</sub> O)(NO <sub>3</sub> )] (11) | 22.92                       | 3.58                        | 5.08                       | 6.59                      | 0.42                       | 23.94                     | 32.34                    |
| [Co(L <sub>5</sub> H)(H <sub>2</sub> O)(EtOH)] <sup>+</sup> (12)              | 23.95                       | 3.35                        | 5.89                       | 7.67                      | 0.13                       | 25.26                     | 33.85                    |
| [Co(L <sub>5</sub> )(H <sub>2</sub> O)] (13)                                  | 23.77                       | 3.14                        | 5.21                       | 6.57                      | 0.34                       | 23.17                     | 33.44                    |
| [Co(L <sub>5</sub> )(im) <sub>2</sub> ] (14)                                  | 22.49                       | 3.21                        | 5.99                       | 7.75                      | 0.40                       | 23.01                     | 33.77                    |
| [Co(L <sub>5</sub> H <sub>2</sub> )(NCS) <sub>2</sub> ] (15)                  | 23.58                       | 2.93                        | 5.59                       | 7.33                      | 0.25                       | 24.45                     | 33.69                    |
| [Co(NO <sub>3</sub> )(EtOH)] <sup>+</sup> (16)                                | 24.00                       | 3.38                        | 5.64                       | 7.36                      | 0.20                       | 24.73                     | 32.87                    |

JETPY = Johnson elongated triangular pyramid, JPBPY = Johnson pentagonal bipyramid, CTPR = capped trigonal prism, COC = capped octahedron, PBPY = pentagonal bipyramid, HPY = hexagonal pyramid, HP = heptagon.

| Complexes | CAS(7,5)SCF/NEVPT2    |      | CAS(7,10)SCF/NEVPT2   |      |
|-----------|-----------------------|------|-----------------------|------|
|           | D (cm <sup>-1</sup> ) | E/D  | D (cm <sup>-1</sup> ) | E/D  |
| 1         | 40.78                 | 0.07 | 41.27                 | 0.07 |
| 2         | 61.74                 | 0.26 | 62.15                 | 0.25 |
| 3         | 40.83                 | 0.12 | 41.98                 | 0.11 |
| 4         | 31.34                 | 0.14 | 33.08                 | 0.13 |
| 5         | 31.35                 | 0.14 | 33.09                 | 0.13 |
| 6         | 31.35                 | 0.14 | 33.09                 | 0.13 |
| 7         | 30.49                 | 0.12 | 32.33                 | 0.12 |
| 8         | 35.15                 | 0.02 | 35.21                 | 0.02 |
| 9         | 47.30                 | 0.04 | 47.14                 | 0.04 |
| 10        | 36.97                 | 0.03 | 37.84                 | 0.03 |
| 11        | 35.50                 | 0.07 | 36.08                 | 0.07 |
| 12        | 37.51                 | 0.01 | 37.96                 | 0.01 |
| 13        | 34.35                 | 0.06 | 34.74                 | 0.06 |
| 14        | 35.00                 | 0.06 | 35.34                 | 0.06 |
| 15        | 38.07                 | 0.05 | 38.77                 | 0.05 |
| 16        | 38.21                 | 0.01 | 38.40                 | 0.02 |

**Table S2:** Comparison of ZFS parameters obtained from different active space calculations:

**Table S3.** Ab initio ligand field (AIFLT) parameters with CAS(7,5) active space fitted to NEVPT2 energies.

| Complex                                                                                | Orbital energies (cm <sup>-1</sup> ) |                 |                 |                                          |                            | B<br>(cm <sup>-1</sup> ) | C/B  | $\zeta$<br>(cm <sup>-1</sup> ) |
|----------------------------------------------------------------------------------------|--------------------------------------|-----------------|-----------------|------------------------------------------|----------------------------|--------------------------|------|--------------------------------|
|                                                                                        | d <sub>xz</sub>                      | d <sub>yz</sub> | d <sub>xy</sub> | d <sub>x<sup>2</sup>-y<sup>2</sup></sub> | d <sub>z<sup>2</sup></sub> |                          |      |                                |
| [Co(py) <sub>3</sub> (NO <sub>3</sub> ) <sub>2</sub> ] ( <b>1</b> )                    | 0                                    | 280             | 2537            | 4598                                     | 8846                       | 1000                     | 3.84 | 523                            |
| [Co(tbp) <sub>3</sub> (NO <sub>3</sub> ) <sub>2</sub> ] ( <b>2</b> )                   | 0                                    | 723             | 1403            | 6260                                     | 8735                       | 1003                     | 3.83 | 520                            |
| [Co(isq) <sub>3</sub> (NO <sub>3</sub> ) <sub>2</sub> ] ( <b>3</b> )                   | 0                                    | 498             | 1841            | 5821                                     | 9080                       | 1002                     | 3.83 | 520                            |
| [Co(L <sub>1</sub> )] <sup>2+</sup> ( <b>4</b> )                                       | 0                                    | 293             | 4066            | 4273                                     | 8307                       | 1001                     | 3.85 | 520                            |
| [Co(L <sub>1</sub> )]·2NO <sub>3</sub> ( <b>5</b> )                                    | 0                                    | 372             | 4061            | 4308                                     | 8310                       | 1001                     | 3.85 | 520                            |
| [Co(L <sub>1</sub> )]·2ClO <sub>4</sub> ( <b>6</b> )                                   | 0                                    | 372             | 4097            | 4335                                     | 8286                       | 1001                     | 3.85 | 520                            |
| [Co(L <sub>2</sub> )] <sup>2+</sup> ( <b>7</b> )                                       | 0                                    | 707             | 2600            | 3486                                     | 8399                       | 1001                     | 3.86 | 521                            |
| [Co(L <sub>3</sub> )(H <sub>2</sub> O) <sub>2</sub> ] <sup>2+</sup> ( <b>8</b> )       | 0                                    | 353             | 5866            | 6224                                     | 6492                       | 1006                     | 3.84 | 520                            |
| [Co(L <sub>4</sub> )Cl <sub>2</sub> ] ( <b>9</b> )                                     | 0                                    | 53              | 2102            | 5267                                     | 6348                       | 995                      | 3.90 | 518                            |
| [Co(L <sub>5</sub> H <sub>2</sub> )I(H <sub>2</sub> O)] ( <b>10</b> )                  | 0                                    | 144             | 4277            | 5254                                     | 6152                       | 1000                     | 3.89 | 518                            |
| [Co(L <sub>5</sub> H <sub>2</sub> )(H <sub>2</sub> O)(NO <sub>3</sub> )] ( <b>11</b> ) | 0                                    | 531             | 4614            | 4828                                     | 7225                       | 1003                     | 3.87 | 521                            |
| [Co(L <sub>5</sub> H)(H <sub>2</sub> O)(EtOH)] <sup>+</sup> ( <b>12</b> )              | 0                                    | 781             | 4761            | 6526                                     | 6845                       | 1006                     | 3.87 | 521                            |
| [Co(L <sub>5</sub> )(H <sub>2</sub> O)] ( <b>13</b> )                                  | 0                                    | 66              | 5202            | 5570                                     | 7169                       | 1004                     | 3.85 | 521                            |
| [Co(L <sub>5</sub> )(im) <sub>2</sub> ] ( <b>14</b> )                                  | 0                                    | 232             | 4683            | 4854                                     | 8958                       | 993                      | 3.84 | 520                            |
| [Co(L <sub>5</sub> H <sub>2</sub> )(NCS) <sub>2</sub> ] ( <b>15</b> )                  | 0                                    | 200             | 2704            | 3703                                     | 8707                       | 992                      | 3.86 | 521                            |
| [Co(NO <sub>3</sub> )(EtOH)] <sup>+</sup> ( <b>16</b> )                                | 0                                    | 348             | 4383            | 4626                                     | 7418                       | 1000                     | 3.88 | 521                            |

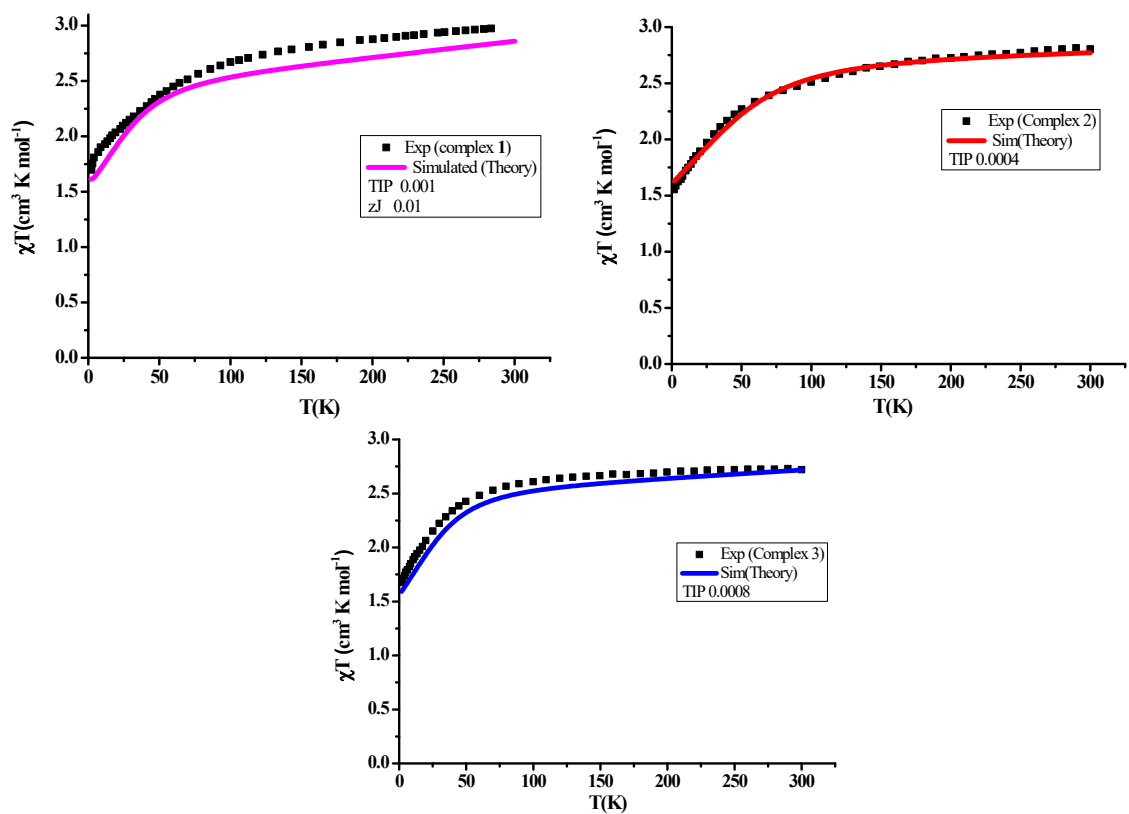

**Figure S1:** Comparison of the  $\chi T$  vs  $T$  experimental plots of complex **1** (top left), **2** (top right) and complex **3** (bottom) versus NEVPT2 simulated ones.<sup>2</sup>

3

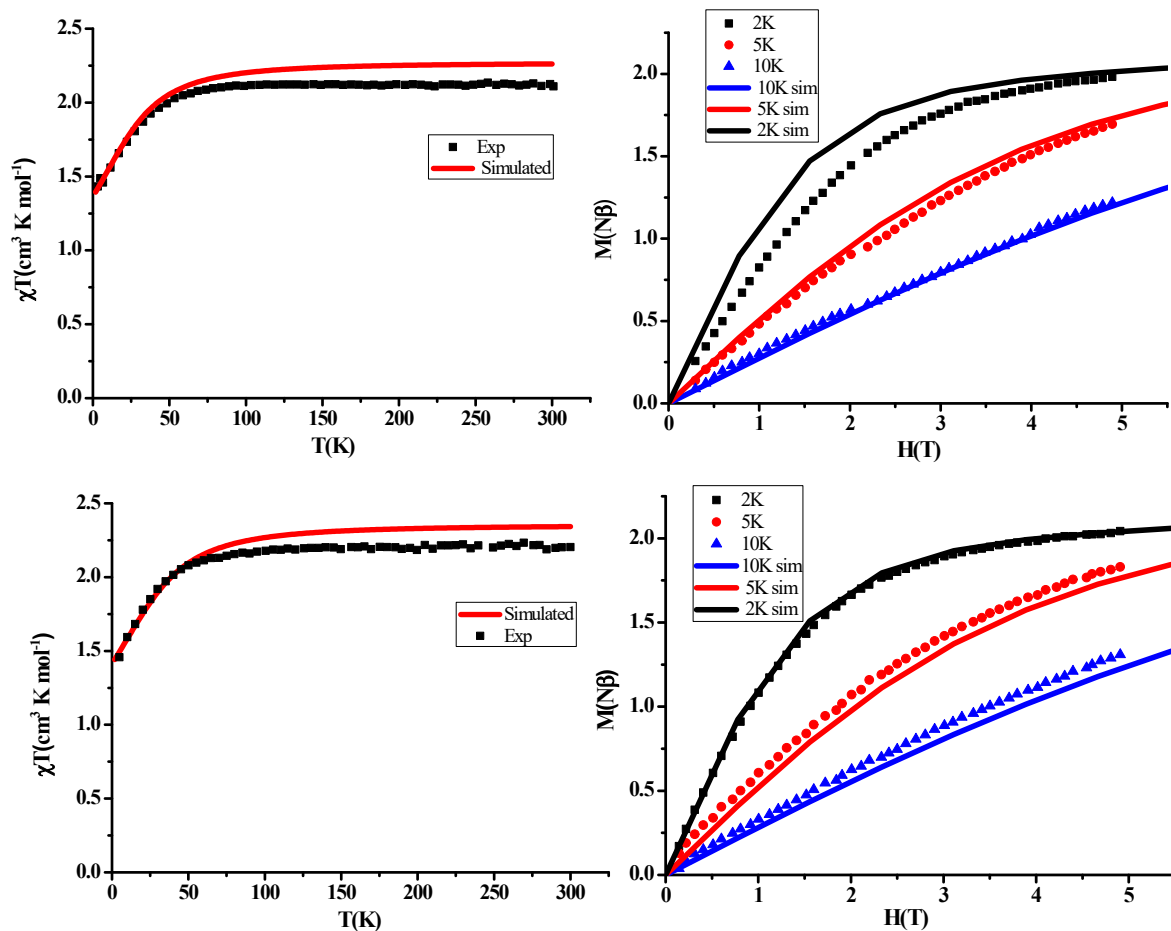

**Figure S2.** Comparison of the  $\chi T$  vs  $T$  and  $M$  vs  $H$  plots for complexes  $13^1$  (top) and  $15^1$  (bottom) with the simulations obtained from NEVPT2 level of theory.

**Table S4.** Comparison of the calculated parameter for the magnetic anisotropy of  $[\text{Co}(\text{py})_3(\text{NO}_3)_2]$  (**1**) at different levels of theory.

| Calculated parameters    | CASSCF | NEVPT2 | Experimental values |
|--------------------------|--------|--------|---------------------|
| $D$ ( $\text{cm}^{-1}$ ) | 49.46  | 40.78  | 68.7                |
| $E/D$                    | 0.08   | 0.07   | 0.07                |
| $g_z$                    | 1.99   | 2.00   | -                   |
| $g_y$                    | 2.44   | 2.34   | -                   |
| $g_x$                    | 2.52   | 2.40   | -                   |
| $g_{\text{iso}}$         | 2.32   | 2.25   | 2.43                |

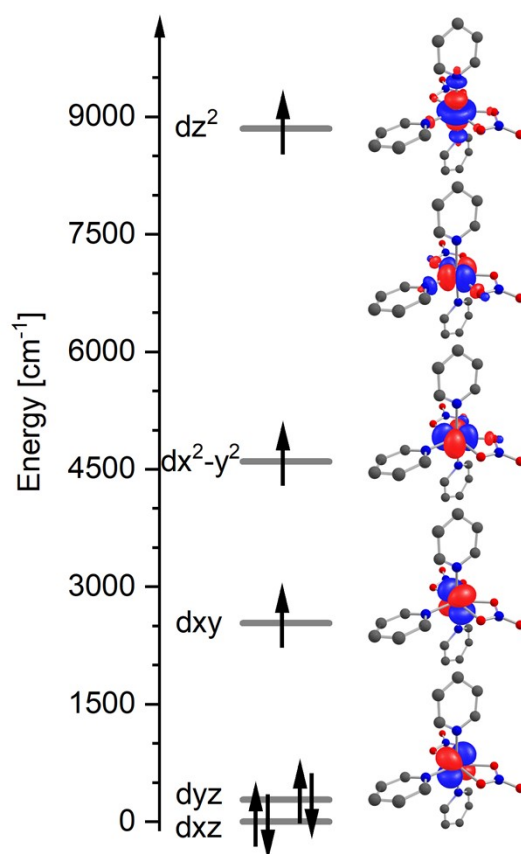

**Figure S3.** AILFT orbital energy diagram for  $[\text{Co}(\text{py})_3(\text{NO}_3)_2]$  (**1**).

**Table S5.** Details of the major contributing excitations that lead to the D- and E-values (NEVPT2 level of theory) calculated for  $[\text{Co}(\text{py})_3(\text{NO}_3)_2]$  (**1**).

| NEVPT2 excited states | NEVPT2 energy (cm <sup>-1</sup> ) | %  | Major electronic configuration |                |                 |                      |                  | Contribution to D (cm <sup>-1</sup> ) | Contribution to E (cm <sup>-1</sup> ) |
|-----------------------|-----------------------------------|----|--------------------------------|----------------|-----------------|----------------------|------------------|---------------------------------------|---------------------------------------|
|                       |                                   |    | $d_{xz}$ (0)                   | $d_{yz}$ (280) | $d_{xy}$ (2536) | $d_{x^2-y^2}$ (4598) | $d_{z^2}$ (8846) |                                       |                                       |
| $^4A_2'$              | 0                                 | 87 | 2                              | 2              | 1               | 1                    | 1                | 0                                     | 0                                     |
|                       |                                   | 11 | 1                              | 1              | 2               | 2                    | 1                |                                       |                                       |
| $^4E_2''$             | 2423                              | 81 | 2                              | 1              | 2               | 1                    | 1                | 5.02                                  | -5.49                                 |
|                       |                                   | 15 | 1                              | 2              | 1               | 2                    | 1                |                                       |                                       |
|                       | 2870                              | 77 | 1                              | 2              | 2               | 1                    | 1                | 3.96                                  | 3.96                                  |
|                       |                                   | 19 | 2                              | 1              | 1               | 2                    | 1                |                                       |                                       |
| $^4E_1''$             | 4970                              | 64 | 2                              | 1              | 1               | 2                    | 1                | 15.29                                 | 15.29                                 |
|                       |                                   | 27 | 2                              | 1              | 1               | 1                    | 2                |                                       |                                       |
|                       | 6302                              | 70 | 1                              | 2              | 1               | 2                    | 1                | 10.65                                 | -10.80                                |
|                       |                                   | 23 | 1                              | 2              | 1               | 1                    | 2                |                                       |                                       |
| $^2A_1'$              | 16894                             | 90 | 2                              | 2              | 1               | 1                    | 1                | 4.94                                  | 0.02                                  |
| $^2A_1'$              | 21629                             | 73 | 1                              | 2              | 1               | 1                    | 2                | 7.97                                  | 0.01                                  |
|                       |                                   | 14 | 1                              | 2              | 1               | 2                    | 1                |                                       |                                       |
|                       |                                   | 13 | 2                              | 1              | 2               | 1                    | 1                |                                       |                                       |

**Table S6.** Computed NEVPT2 transition energies and state-wise contribution to the axial and rhombic ZFS parameters of [Co(py)<sub>3</sub>(NO<sub>3</sub>)<sub>2</sub>] (**1**).

| NEVPT2 excited states | Multiplicity | NEVPT2 energy (cm <sup>-1</sup> ) | Contribution to D (cm <sup>-1</sup> ) | Contribution to E (cm <sup>-1</sup> ) |
|-----------------------|--------------|-----------------------------------|---------------------------------------|---------------------------------------|
| 0                     | 4            | 0                                 | 0.00                                  | 0.00                                  |
| 1                     | 4            | 2423                              | 5.02                                  | -5.49                                 |
| 2                     | 4            | 2870                              | 3.96                                  | 3.96                                  |
| 3                     | 4            | 4970                              | 15.29                                 | 15.29                                 |
| 4                     | 4            | 6302                              | 10.65                                 | -10.83                                |
| 5                     | 4            | 12118                             | 0.02                                  | 0.02                                  |
| 6                     | 2            | 12457                             | 0.17                                  | 0.04                                  |
| 7                     | 4            | 14831                             | 0.00                                  | 0.00                                  |
| 8                     | 2            | 14876                             | 0.00                                  | 0.00                                  |
| 9                     | 2            | 16894                             | 4.94                                  | 0.02                                  |
| 10                    | 2            | 18560                             | 0.00                                  | 0.00                                  |
| 11                    | 2            | 20104                             | -0.65                                 | 0.70                                  |
| 12                    | 2            | 20661                             | -1.27                                 | -1.27                                 |
| 13                    | 2            | 21201                             | -0.83                                 | 0.86                                  |
| 14                    | 2            | 21226                             | -0.40                                 | -0.40                                 |
| 15                    | 4            | 21372                             | 0.01                                  | 0.01                                  |
| 16                    | 2            | 21629                             | 7.97                                  | 0.01                                  |
| 17                    | 4            | 22049                             | 0.14                                  | -0.14                                 |
| 18                    | 2            | 22477                             | 0.00                                  | 0.00                                  |
| 19                    | 4            | 22707                             | 0.10                                  | 0.10                                  |
| 20                    | 2            | 22827                             | 0.01                                  | 0.01                                  |
| 21                    | 2            | 23447                             | 0.00                                  | 0.00                                  |
| 22                    | 2            | 26976                             | -0.06                                 | -0.06                                 |
| 23                    | 2            | 27146                             | -0.07                                 | 0.07                                  |
| 24                    | 2            | 29050                             | -0.12                                 | 0.15                                  |
| 25                    | 2            | 29512                             | -0.07                                 | -0.07                                 |
| 26                    | 2            | 29934                             | -0.06                                 | -0.06                                 |
| 27                    | 2            | 31244                             | 0.36                                  | 0.02                                  |
| 28                    | 2            | 31818                             | 0.03                                  | 0.09                                  |
| 29                    | 2            | 31980                             | -0.07                                 | -0.07                                 |
| 30                    | 2            | 32029                             | -0.03                                 | -0.03                                 |
| 31                    | 2            | 32449                             | 0.13                                  | 0.02                                  |
| 32                    | 2            | 33076                             | 0.99                                  | 0.00                                  |
| 33                    | 2            | 33143                             | 0.00                                  | 0.00                                  |
| 34                    | 2            | 33640                             | -0.02                                 | -0.02                                 |



|    |   |       |       |       |
|----|---|-------|-------|-------|
| 35 | 2 | 33707 | 0.01  | 0.04  |
| 36 | 2 | 35140 | -0.54 | -0.54 |
| 37 | 2 | 35323 | -0.68 | 0.68  |
| 38 | 2 | 42265 | -0.22 | -0.22 |
| 39 | 2 | 42932 | -0.23 | 0.24  |
| 40 | 2 | 43481 | 0.00  | 0.00  |
| 41 | 2 | 43674 | 0.00  | 0.00  |
| 42 | 2 | 43820 | -0.05 | -0.05 |
| 43 | 2 | 43997 | 0.00  | 0.00  |
| 44 | 2 | 44638 | 0.00  | 0.00  |
| 45 | 2 | 63982 | 0.16  | 0.00  |
| 46 | 2 | 64048 | 0.00  | 0.00  |
| 47 | 2 | 64721 | 0.04  | 0.00  |
| 48 | 2 | 65219 | 0.00  | 0.00  |
| 49 | 2 | 65431 | 0.01  | 0.00  |

**Table S7.** Comparison of the calculated parameter for the magnetic anisotropy of  $[\text{Co}(\text{tbp})_3(\text{NO}_3)_2]$  (**2**) at different levels of theory.

| Calculated parameters  | CASSCF | NEVPT2 | Experimental values |
|------------------------|--------|--------|---------------------|
| D ( $\text{cm}^{-1}$ ) | 78.40  | 61.74  | 35.8                |
| E/D                    | 0.25   | 0.26   | 0.00                |
| $g_z$                  | 1.95   | 1.97   | 1.98                |
| $g_y$                  | 2.40   | 2.35   | 2.21                |
| $g_x$                  | 2.85   | 2.72   | 2.21                |
| $g_{\text{iso}}$       | 2.4    | 2.35   | 2.13                |

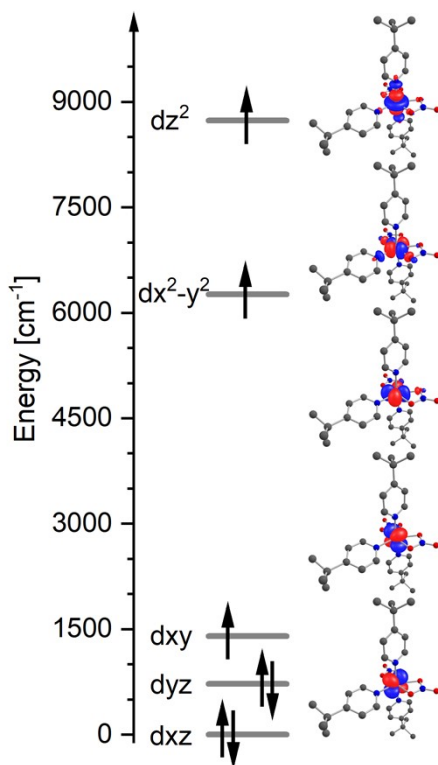

**Figure S4.** AILFT orbital energy diagram for  $[\text{Co}(\text{tpb})_3(\text{NO}_3)_2]$  (**2**).

**Table S8.** Details of the major contributing excitations that lead to the D- and E-values (NEVPT2 level of theory) calculated for  $[\text{Co}(\text{tpb})_3(\text{NO}_3)_2]$  (**2**).

| NEVPT2 excited states       | NEVPT2 energy (cm <sup>-1</sup> ) | %  | Major electronic configuration |                |                 |                      |                  | Contribution to D (cm <sup>-1</sup> ) | Contribution to E (cm <sup>-1</sup> ) |
|-----------------------------|-----------------------------------|----|--------------------------------|----------------|-----------------|----------------------|------------------|---------------------------------------|---------------------------------------|
|                             |                                   |    | $d_{xz}$ (0)                   | $d_{yz}$ (723) | $d_{xy}$ (1403) | $d_{x^2-y^2}$ (6260) | $d_{z^2}$ (8735) |                                       |                                       |
| <sup>4</sup> A <sub>2</sub> | 0                                 | 83 | 2                              | 2              | 1               | 1                    | 1                | 0                                     | 0                                     |
|                             |                                   | 11 | 1                              | 1              | 2               | 2                    | 1                |                                       |                                       |
| <sup>4</sup> B <sub>1</sub> | 927                               | 74 | 2                              | 1              | 2               | 1                    | 1                | 28.68                                 | 28.87                                 |
|                             |                                   | 11 | 1                              | 2              | 2               | 1                    | 1                |                                       |                                       |
| <sup>4</sup> B <sub>2</sub> | 1727                              | 71 | 1                              | 2              | 2               | 1                    | 1                | 11.34                                 | -11.74                                |
|                             |                                   | 12 | 2                              | 1              | 2               | 1                    | 1                |                                       |                                       |
| <sup>4</sup> B <sub>1</sub> | 6774                              | 41 | 2                              | 1              | 1               | 2                    | 1                | 7.863                                 | 5.32                                  |
|                             |                                   | 35 | 1                              | 2              | 1               | 2                    | 1                |                                       |                                       |
|                             |                                   | 11 | 1                              | 2              | 1               | 1                    | 2                |                                       |                                       |
| <sup>4</sup> B <sub>2</sub> | 7003                              | 37 | 1                              | 2              | 1               | 2                    | 1                | 5.21                                  | -5.69                                 |
|                             |                                   | 33 | 2                              | 1              | 1               | 2                    | 1                |                                       |                                       |
|                             |                                   | 13 | 2                              | 1              | 1               | 1                    | 2                |                                       |                                       |
|                             |                                   | 12 | 1                              | 2              | 1               | 1                    | 2                |                                       |                                       |
| <sup>2</sup> A <sub>1</sub> | 13899                             | 82 | 2                              | 2              | 2               | 0                    | 1                | 6.86                                  | 0.07                                  |
| <sup>2</sup> A <sub>1</sub> | 23892                             | 51 | 2                              | 2              | 0               | 2                    | 1                | 4.88                                  | -0.00                                 |
|                             |                                   | 13 | 2                              | 0              | 2               | 1                    | 2                |                                       |                                       |
|                             |                                   | 13 | 0                              | 2              | 2               | 1                    | 2                |                                       |                                       |

**Table S9.** Computed NEVPT2 transition energies and state-wise contribution to the axial and rhombic ZFS parameters of  $[\text{Co}(\text{tbp})_3(\text{NO}_3)_2]$  (**2**).

| NEVPT2 excited states | Multiplicity | NEVPT2 energy (cm <sup>-1</sup> ) | Contribution to D (cm <sup>-1</sup> ) | Contribution to E (cm <sup>-1</sup> ) |
|-----------------------|--------------|-----------------------------------|---------------------------------------|---------------------------------------|
| 0                     | 4            | 0                                 | 0.00                                  | 0.00                                  |
| 1                     | 4            | 927                               | 28.68                                 | 28.87                                 |
| 2                     | 4            | 1728                              | 11.34                                 | -11.74                                |
| 3                     | 4            | 6775                              | 7.86                                  | 5.32                                  |
| 4                     | 4            | 7004                              | 5.21                                  | -5.69                                 |
| 5                     | 4            | 10102                             | 0.20                                  | -0.18                                 |
| 6                     | 2            | 11370                             | 0.14                                  | -0.11                                 |
| 7                     | 2            | 13899                             | 6.86                                  | 0.07                                  |
| 8                     | 4            | 16019                             | 0.00                                  | 0.00                                  |
| 9                     | 2            | 16703                             | 0.01                                  | 0.01                                  |
| 10                    | 2            | 18543                             | 0.00                                  | 0.00                                  |
| 11                    | 2            | 19074                             | -1.18                                 | -1.14                                 |
| 12                    | 2            | 19634                             | -0.60                                 | 0.60                                  |
| 13                    | 2            | 20301                             | -0.73                                 | 0.04                                  |
| 14                    | 2            | 20513                             | -0.42                                 | 0.41                                  |
| 15                    | 4            | 21285                             | 0.07                                  | -0.07                                 |
| 16                    | 4            | 21537                             | 0.04                                  | -0.04                                 |
| 17                    | 2            | 22496                             | 0.01                                  | 0.00                                  |
| 18                    | 2            | 22671                             | 0.02                                  | 0.00                                  |
| 19                    | 4            | 23037                             | 0.09                                  | 0.09                                  |
| 20                    | 2            | 23227                             | 0.00                                  | 0.00                                  |
| 21                    | 2            | 23892                             | 4.88                                  | 0.00                                  |
| 22                    | 2            | 27247                             | -0.26                                 | 0.13                                  |
| 23                    | 2            | 27661                             | -0.39                                 | -0.18                                 |
| 24                    | 2            | 27952                             | 0.02                                  | 0.08                                  |
| 25                    | 2            | 28695                             | -0.02                                 | -0.01                                 |
| 26                    | 2            | 28850                             | -0.01                                 | 0.00                                  |
| 27                    | 2            | 30400                             | -0.02                                 | -0.01                                 |
| 28                    | 2            | 30731                             | 0.98                                  | 0.08                                  |
| 29                    | 2            | 31578                             | 0.09                                  | -0.05                                 |
| 30                    | 2            | 32783                             | 0.15                                  | 0.06                                  |
| 31                    | 2            | 33167                             | -0.11                                 | 0.08                                  |
| 32                    | 2            | 33261                             | -0.06                                 | -0.07                                 |

|    |   |       |       |       |
|----|---|-------|-------|-------|
| 33 | 2 | 34162 | 0.39  | 0.00  |
| 34 | 2 | 34237 | 0.04  | 0.03  |
| 35 | 2 | 34604 | -0.32 | 0.35  |
| 36 | 2 | 34646 | -0.12 | 0.11  |
| 37 | 2 | 35486 | -0.40 | -0.38 |
| 38 | 2 | 41949 | -0.08 | 0.02  |
| 39 | 2 | 42588 | -0.24 | -0.06 |
| 40 | 2 | 43244 | 0.00  | 0.00  |
| 41 | 2 | 43550 | 0.00  | 0.00  |
| 42 | 2 | 43804 | 0.00  | 0.00  |
| 43 | 2 | 44324 | -0.07 | 0.00  |
| 44 | 2 | 44779 | 0.00  | 0.00  |
| 45 | 2 | 63788 | 0.12  | 0.00  |
| 46 | 2 | 64012 | 0.00  | 0.00  |
| 47 | 2 | 65039 | 0.00  | 0.00  |
| 48 | 2 | 65104 | 0.00  | 0.00  |
| 49 | 2 | 65750 | 0.06  | 0.00  |

**Table S10.** Comparison of the calculated parameter for the magnetic anisotropy of  $[\text{Co}(\text{isq})_3(\text{NO}_3)_2]$  (**3**) at different levels of theory.

| Calculated parameters  | CASSCF | NEVPT2 | Experimental values |
|------------------------|--------|--------|---------------------|
| D ( $\text{cm}^{-1}$ ) | 52.23  | 40.8   | 35.7                |
| E/D                    | 0.14   | 0.13   | 0.05                |
| $g_z$                  | 2.04   | 2.03   | 2.21                |
| $g_y$                  | 2.44   | 2.35   | 2.21                |
| $g_x$                  | 2.60   | 2.46   | 2.00                |
| $g_{\text{iso}}$       | 2.36   | 2.28   | 2.14                |

**Table S11.** Details of the major contributing excitations that lead to the D- and E-values (NEVPT2 level of theory) calculated for [Co(isq)<sub>3</sub>(NO<sub>3</sub>)<sub>2</sub>] (**3**).

| NEVPT2 excited states       | NEVPT2 energy (cm <sup>-1</sup> ) | %  | Major electronic configuration |                       |                        |                                                 |                                   | Contribution to D (cm <sup>-1</sup> ) | Contribution to E (cm <sup>-1</sup> ) |
|-----------------------------|-----------------------------------|----|--------------------------------|-----------------------|------------------------|-------------------------------------------------|-----------------------------------|---------------------------------------|---------------------------------------|
|                             |                                   |    | d <sub>xz</sub> (0)            | d <sub>yz</sub> (498) | d <sub>xy</sub> (1841) | d <sub>x<sup>2</sup>-y<sup>2</sup></sub> (5821) | d <sub>z<sup>2</sup></sub> (9080) |                                       |                                       |
| <sup>4</sup> A <sub>2</sub> | 0                                 | 78 | 2                              | 2                     | 1                      | 1                                               | 1                                 | 0.00                                  | 0.00                                  |
|                             |                                   | 10 | 1                              | 1                     | 2                      | 2                                               | 1                                 |                                       |                                       |
| <sup>4</sup> B <sub>1</sub> | 1933                              | 67 | 1                              | 2                     | 2                      | 1                                               | 1                                 | 11.97                                 | 13.53                                 |
|                             |                                   | 18 | 1                              | 2                     | 2                      | 1                                               | 1                                 |                                       |                                       |
| <sup>4</sup> B <sub>2</sub> | 2110                              | 61 | 2                              | 1                     | 2                      | 1                                               | 1                                 | 8.65                                  | -8.67                                 |
|                             |                                   | 15 | 1                              | 2                     | 2                      | 1                                               | 1                                 |                                       |                                       |
| <sup>4</sup> B <sub>1</sub> | 6353                              | 65 | 2                              | 1                     | 1                      | 2                                               | 1                                 | 5.73                                  | 8.30                                  |
|                             |                                   | 19 | 2                              | 1                     | 1                      | 1                                               | 2                                 |                                       |                                       |
|                             |                                   | 11 | 1                              | 2                     | 1                      | 2                                               | 1                                 |                                       |                                       |
| <sup>4</sup> B <sub>2</sub> | 7044                              | 63 | 1                              | 2                     | 1                      | 2                                               | 1                                 | 8.03                                  | -8.35                                 |
|                             |                                   | 19 | 1                              | 2                     | 1                      | 1                                               | 2                                 |                                       |                                       |
| <sup>2</sup> A <sub>1</sub> | 14913                             | 84 | 2                              | 2                     | 2                      | 0                                               | 1                                 | 6.12                                  | -0.25                                 |
| <sup>2</sup> A <sub>1</sub> | 23393                             | 60 | 2                              | 2                     | 0                      | 2                                               | 1                                 | 5.74                                  | 0.00                                  |
|                             |                                   | 10 | 2                              | 0                     | 2                      | 1                                               | 2                                 |                                       |                                       |
|                             |                                   | 78 | 2                              | 2                     | 1                      | 1                                               | 1                                 |                                       |                                       |

**Table S12.** Computed NEVPT2 transition energies and state-wise contribution to the axial and rhombic ZFS parameters of [Co(isq)<sub>3</sub>(NO<sub>3</sub>)<sub>2</sub>] (**3**).

| NEVPT2 excited states | Multiplicity | NEVPT2 energy (cm <sup>-1</sup> ) | Contribution to D (cm <sup>-1</sup> ) | Contribution to E (cm <sup>-1</sup> ) |
|-----------------------|--------------|-----------------------------------|---------------------------------------|---------------------------------------|
| 0                     | 4            | 0                                 | 0.00                                  | 0.00                                  |
| 1                     | 4            | 1933                              | 11.97                                 | 13.53                                 |
| 2                     | 4            | 2110                              | 8.65                                  | -8.67                                 |
| 3                     | 4            | 6353                              | 5.73                                  | 8.30                                  |
| 4                     | 4            | 7044                              | 8.03                                  | -8.35                                 |
| 5                     | 4            | 11379                             | 0.16                                  | 0.13                                  |
| 6                     | 2            | 11539                             | -0.09                                 | 0.25                                  |
| 7                     | 2            | 14913                             | 6.12                                  | -0.25                                 |
| 8                     | 2            | 15943                             | -0.03                                 | -0.01                                 |
| 9                     | 4            | 16215                             | 0.02                                  | -0.01                                 |
| 10                    | 2            | 18565                             | 0.00                                  | 0.00                                  |
| 11                    | 2            | 19904                             | -0.71                                 | 0.71                                  |
| 12                    | 2            | 19928                             | -1.09                                 | -1.17                                 |
| 13                    | 2            | 20916                             | -0.58                                 | -0.07                                 |
| 14                    | 2            | 21122                             | -0.54                                 | 0.44                                  |
| 15                    | 4            | 21811                             | 0.01                                  | -0.01                                 |
| 16                    | 4            | 21910                             | 0.10                                  | -0.10                                 |

|    |   |       |       |       |
|----|---|-------|-------|-------|
| 17 | 2 | 22765 | 0.00  | 0.01  |
| 18 | 2 | 22819 | 0.00  | 0.00  |
| 19 | 4 | 23250 | 0.10  | 0.10  |
| 20 | 2 | 23393 | 5.74  | 0.00  |
| 21 | 2 | 23437 | 0.01  | 0.00  |
| 22 | 2 | 27276 | -0.22 | -0.22 |
| 23 | 2 | 27763 | -0.23 | 0.21  |
| 24 | 2 | 28726 | -0.12 | 0.12  |
| 25 | 2 | 28813 | -0.06 | -0.09 |
| 26 | 2 | 29851 | 0.02  | 0.00  |
| 27 | 2 | 31273 | -0.05 | 0.02  |
| 28 | 2 | 31523 | 0.75  | -0.07 |
| 29 | 2 | 32187 | 0.02  | 0.00  |
| 30 | 2 | 32744 | -0.17 | 0.19  |
| 31 | 2 | 33029 | 0.03  | -0.08 |
| 32 | 2 | 33860 | -0.12 | -0.12 |
| 33 | 2 | 34279 | 0.75  | 0.00  |
| 34 | 2 | 34280 | -0.14 | 0.14  |
| 35 | 2 | 34912 | -0.13 | 0.12  |
| 36 | 2 | 35362 | -0.36 | 0.35  |
| 37 | 2 | 36091 | -0.37 | -0.36 |
| 38 | 2 | 42278 | -0.16 | 0.01  |
| 39 | 2 | 42883 | -0.21 | -0.04 |
| 40 | 2 | 43814 | 0.03  | 0.00  |
| 41 | 2 | 43898 | 0.00  | 0.00  |
| 42 | 2 | 43959 | 0.00  | 0.00  |
| 43 | 2 | 44502 | -0.06 | 0.00  |
| 44 | 2 | 45079 | 0.00  | 0.00  |
| 45 | 2 | 64075 | 0.14  | 0.00  |
| 46 | 2 | 64319 | 0.00  | 0.00  |
| 47 | 2 | 65213 | 0.00  | 0.00  |
| 48 | 2 | 65425 | 0.00  | 0.00  |
| 49 | 2 | 65969 | 0.03  | 0.00  |

**Table S13.** Comparison of the calculated parameter for the magnetic anisotropy of  $[\text{Co}(\text{L}_1)]^{2+}$  (**4**) at different levels of theory.

| Calculated parameters  | CASSCF | NEVPT2 | Experimental values |
|------------------------|--------|--------|---------------------|
| D ( $\text{cm}^{-1}$ ) | 37.19  | 31.34  | -                   |
| E/D                    | 0.15   | 0.14   | -                   |
| $g_z$                  | 2.05   | 2.04   | -                   |
| $g_y$                  | 2.35   | 2.27   | -                   |
| $g_x$                  | 2.48   | 2.37   | -                   |
| $g_{\text{iso}}$       | 2.29   | 2.23   | -                   |

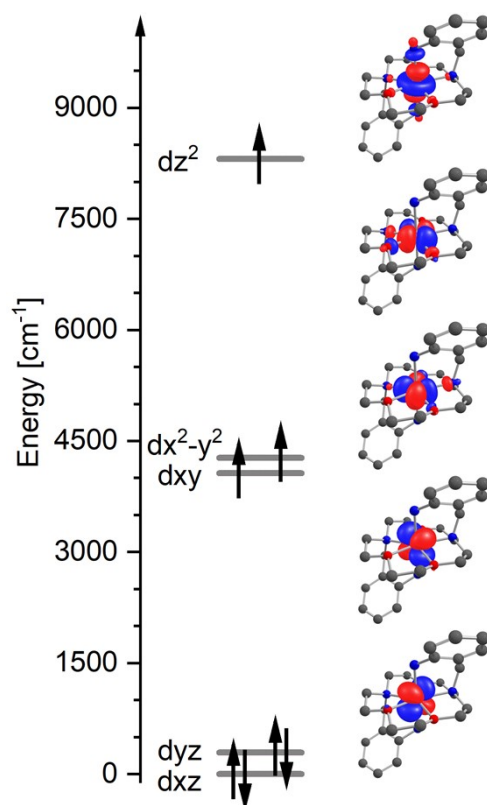

**Figure S5.** AILFT orbital energy diagram for  $[\text{Co}(\text{L}_1)]^{2+}$  (**4**).

**Table S14.** Details of the major contributing excitations that lead to the D- and E-values (NEVPT2 level of theory) calculated for  $[\text{Co}(\text{L}_1)]^{2+}$  (**4**).

| NEVPT2 excited states         | NEVPT2 energy (cm <sup>-1</sup> ) | %  | Major electronic configuration |                       |                        |                                                 |                                   | Contribution to D (cm <sup>-1</sup> ) | Contribution to E (cm <sup>-1</sup> ) |
|-------------------------------|-----------------------------------|----|--------------------------------|-----------------------|------------------------|-------------------------------------------------|-----------------------------------|---------------------------------------|---------------------------------------|
|                               |                                   |    | d <sub>xz</sub> (0)            | d <sub>yz</sub> (293) | d <sub>xy</sub> (4066) | d <sub>x<sup>2</sup>-y<sup>2</sup></sub> (4273) | d <sub>z<sup>2</sup></sub> (8307) |                                       |                                       |
| <sup>4</sup> A <sub>2</sub>   | 0                                 | 74 | 2                              | 2                     | 1                      | 1                                               | 1                                 | 0.00                                  | 0.00                                  |
| <sup>4</sup> E <sub>2</sub> " | 3621                              | 55 | 1                              | 2                     | 2                      | 1                                               | 1                                 | -0.28                                 | 2.94                                  |
|                               |                                   | 25 | 2                              | 1                     | 1                      | 2                                               | 1                                 |                                       |                                       |
|                               | 3998                              | 51 | 1                              | 2                     | 1                      | 2                                               | 1                                 | 0.35                                  | -0.35                                 |
|                               |                                   | 33 | 2                              | 1                     | 2                      | 1                                               | 1                                 |                                       |                                       |
| <sup>4</sup> E <sub>1</sub> " | 5164                              | 32 | 2                              | 1                     | 1                      | 2                                               | 1                                 | 13.80                                 | 14.30                                 |
|                               |                                   | 26 | 1                              | 2                     | 1                      | 2                                               | 1                                 |                                       |                                       |
|                               |                                   | 16 | 1                              | 2                     | 1                      | 1                                               | 2                                 |                                       |                                       |
|                               |                                   | 12 | 2                              | 1                     | 2                      | 1                                               | 1                                 |                                       |                                       |
| <sup>4</sup> E <sub>1</sub> " | 6176                              | 23 | 1                              | 2                     | 2                      | 1                                               | 1                                 | 12.50                                 | 12.50                                 |
|                               |                                   | 17 | 2                              | 1                     | 1                      | 2                                               | 1                                 |                                       |                                       |
|                               |                                   | 16 | 2                              | 1                     | 1                      | 1                                               | 2                                 |                                       |                                       |
|                               |                                   | 16 | 2                              | 1                     | 2                      | 1                                               | 1                                 |                                       |                                       |
|                               |                                   | 10 | 2                              | 2                     | 1                      | 1                                               | 1                                 |                                       |                                       |
| <sup>2</sup> A <sub>1</sub> ' | 20684                             | 17 | 2                              | 2                     | 2                      | 0                                               | 1                                 | 8.79                                  | -0.39                                 |
|                               |                                   | 16 | 1                              | 2                     | 2                      | 1                                               | 1                                 |                                       |                                       |
|                               |                                   | 14 | 2                              | 2                     | 0                      | 2                                               | 1                                 |                                       |                                       |
|                               |                                   | 11 | 2                              | 1                     | 2                      | 1                                               | 1                                 |                                       |                                       |

**Table S15.** Computed NEVPT2 transition energies and state-wise contribution to the axial and rhombic ZFS parameters of  $[\text{Co}(\text{L}_1)]^{2+}$  (**4**).

| NEVPT2 excited states | Multiplicity | NEVPT2 energy (cm <sup>-1</sup> ) | Contribution to D (cm <sup>-1</sup> ) | Contribution to E (cm <sup>-1</sup> ) |
|-----------------------|--------------|-----------------------------------|---------------------------------------|---------------------------------------|
| 0                     | 4            | 0                                 | 0.00                                  | 0.00                                  |
| 1                     | 4            | 3621                              | -0.28                                 | 2.94                                  |
| 2                     | 4            | 3998                              | 0.35                                  | -0.35                                 |
| 3                     | 4            | 5164                              | 13.80                                 | 14.30                                 |
| 4                     | 4            | 6176                              | 12.50                                 | -12.50                                |
| 5                     | 4            | 13352                             | 0.05                                  | 0.05                                  |
| 6                     | 4            | 13594                             | 0.04                                  | -0.04                                 |
| 7                     | 2            | 14672                             | -0.12                                 | 0.12                                  |
| 8                     | 2            | 14823                             | 0.14                                  | -0.06                                 |
| 9                     | 2            | 18512                             | 0.14                                  | -0.03                                 |
| 10                    | 2            | 18557                             | -0.01                                 | 0.01                                  |
| 11                    | 2            | 20684                             | 8.79                                  | -0.39                                 |
| 12                    | 2            | 21231                             | 1.69                                  | -0.13                                 |
| 13                    | 2            | 21305                             | -0.06                                 | 0.06                                  |



|    |   |       |       |       |
|----|---|-------|-------|-------|
| 14 | 4 | 21514 | 0.09  | -0.09 |
| 15 | 2 | 21730 | 0.09  | -1.20 |
| 16 | 2 | 21966 | -1.51 | 1.51  |
| 17 | 4 | 22520 | 0.07  | 0.07  |
| 18 | 2 | 22626 | 0.00  | 0.00  |
| 19 | 4 | 22805 | 0.01  | -0.01 |
| 20 | 2 | 23637 | 0.00  | 0.00  |
| 21 | 2 | 24650 | 0.00  | 0.00  |
| 22 | 2 | 27166 | 0.02  | -0.01 |
| 23 | 2 | 27309 | 0.00  | 0.00  |
| 24 | 2 | 29646 | -0.15 | 0.15  |
| 25 | 2 | 29769 | -0.22 | 0.22  |
| 26 | 2 | 30132 | -0.22 | -0.23 |
| 27 | 2 | 30283 | -0.03 | -0.05 |
| 28 | 2 | 31472 | 0.03  | -0.03 |
| 29 | 2 | 31821 | -0.03 | 0.03  |
| 30 | 2 | 32164 | 1.28  | 0.00  |
| 31 | 2 | 32607 | -0.02 | -0.02 |
| 32 | 2 | 32641 | -0.01 | 0.01  |
| 33 | 2 | 33387 | 0.00  | 0.00  |
| 34 | 2 | 33689 | -0.27 | 0.27  |
| 35 | 2 | 34032 | -0.13 | -0.16 |
| 36 | 2 | 35496 | -0.37 | -0.37 |
| 37 | 2 | 35677 | -0.42 | 0.42  |
| 38 | 2 | 42797 | -0.10 | -0.11 |
| 39 | 2 | 42891 | -0.07 | 0.07  |
| 40 | 2 | 43609 | -0.09 | -0.11 |
| 41 | 2 | 43782 | -0.11 | 0.11  |
| 42 | 2 | 44256 | -0.01 | 0.01  |
| 43 | 2 | 44364 | 0.00  | 0.00  |
| 44 | 2 | 44513 | -0.01 | 0.01  |
| 45 | 2 | 64020 | 0.00  | 0.00  |
| 46 | 2 | 64359 | 0.00  | 0.00  |
| 47 | 2 | 64543 | 0.09  | 0.00  |
| 48 | 2 | 65696 | -0.01 | 0.01  |
| 49 | 2 | 65792 | 0.10  | 0.00  |

**Table S16.** Comparison of the calculated parameter for the magnetic anisotropy of  $[\text{Co}(\text{L}_1)] \cdot 2\text{NO}_3$  (**5**) at different levels of theory.

| Calculated parameters  | CASSCF | NEVPT2 | Experimental values |
|------------------------|--------|--------|---------------------|
| D ( $\text{cm}^{-1}$ ) | 37.20  | 31.35  | 25.00               |
| E/D                    | 0.15   | 0.14   | 0.00                |
| $g_z$                  | 2.05   | 2.04   | -                   |
| $g_y$                  | 2.36   | 2.27   | -                   |
| $g_x$                  | 2.48   | 2.37   | -                   |
| $g_{\text{iso}}$       | 2.29   | 2.23   | 2.22                |

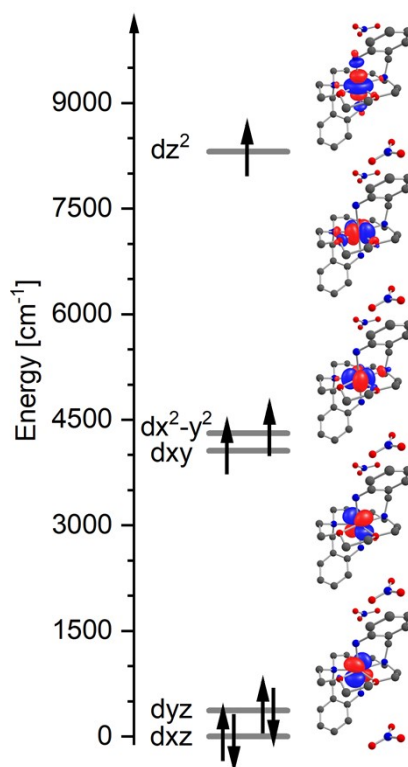

**Figure S6.** AILFT orbital energy diagram for  $[\text{Co}(\text{L}_1)] \cdot 2\text{NO}_3$  (**5**).

**Table S17.** Details of the major contributing excitations that lead to the D- and E-values (NEVPT2 level of theory) calculated for [Co(L<sub>1</sub>)]·2NO<sub>3</sub> (**5**).

| NEVPT2 excited states | NEVPT2 energy (cm <sup>-1</sup> ) | %  | Major electronic configuration |                       |                        |                                                 |                                   | Contribution to D (cm <sup>-1</sup> ) | Contribution to E (cm <sup>-1</sup> ) |
|-----------------------|-----------------------------------|----|--------------------------------|-----------------------|------------------------|-------------------------------------------------|-----------------------------------|---------------------------------------|---------------------------------------|
|                       |                                   |    | d <sub>xz</sub> (0)            | d <sub>yz</sub> (372) | d <sub>xy</sub> (4061) | d <sub>x<sup>2</sup>-y<sup>2</sup></sub> (4335) | d <sub>z<sup>2</sup></sub> (8399) |                                       |                                       |
| 0                     | 0                                 | 78 | 2                              | 2                     | 1                      | 1                                               | 1                                 | 0.00                                  | 0.00                                  |
| 1                     | 3575                              | 56 | 1                              | 2                     | 2                      | 1                                               | 1                                 | -0.16                                 | 3.03                                  |
|                       |                                   | 28 | 2                              | 1                     | 1                      | 2                                               | 1                                 |                                       |                                       |
| 2                     | 3965                              | 55 | 1                              | 2                     | 1                      | 2                                               | 1                                 | 0.37                                  | -0.38                                 |
|                       |                                   | 34 | 2                              | 1                     | 2                      | 1                                               | 1                                 |                                       |                                       |
| 3                     | 5186                              | 32 | 2                              | 1                     | 1                      | 2                                               | 1                                 | 13.65                                 | 14.12                                 |
|                       |                                   | 23 | 1                              | 2                     | 1                      | 2                                               | 1                                 |                                       |                                       |
|                       |                                   | 16 | 1                              | 2                     | 1                      | 1                                               | 2                                 |                                       |                                       |
|                       |                                   | 12 | 2                              | 1                     | 2                      | 1                                               | 1                                 |                                       |                                       |
| 4                     | 6116                              | 27 | 1                              | 2                     | 2                      | 1                                               | 1                                 | 12.62                                 | -12.61                                |
|                       |                                   | 19 | 2                              | 1                     | 1                      | 1                                               | 2                                 |                                       |                                       |
|                       |                                   | 18 | 2                              | 1                     | 1                      | 2                                               | 1                                 |                                       |                                       |
|                       |                                   | 16 | 2                              | 1                     | 2                      | 1                                               | 1                                 |                                       |                                       |
| 11                    | 20720                             | 19 | 2                              | 2                     | 2                      | 0                                               | 1                                 | 8.02                                  | -0.40                                 |
|                       |                                   | 17 | 1                              | 2                     | 2                      | 1                                               | 1                                 |                                       |                                       |
|                       |                                   | 14 | 2                              | 2                     | 0                      | 2                                               | 1                                 |                                       |                                       |

**Table S18.** Computed NEVPT2 transition energies and state-wise contribution to the axial and rhombic ZFS parameters of [Co(L<sub>1</sub>)]·2NO<sub>3</sub> (**5**).

| NEVPT2 excited states | Multiplicity | NEVPT2 energy (cm <sup>-1</sup> ) | Contribution to D (cm <sup>-1</sup> ) | Contribution to E (cm <sup>-1</sup> ) |
|-----------------------|--------------|-----------------------------------|---------------------------------------|---------------------------------------|
| 0                     | 4            | 0                                 | 0.00                                  | 0.00                                  |
| 1                     | 4            | 3575                              | -0.16                                 | 3.03                                  |
| 2                     | 4            | 3965                              | 0.37                                  | -0.38                                 |
| 3                     | 4            | 5186                              | 13.65                                 | 14.12                                 |
| 4                     | 4            | 6116                              | 12.62                                 | -12.61                                |
| 5                     | 4            | 13277                             | 0.05                                  | 0.05                                  |
| 6                     | 4            | 13580                             | 0.04                                  | -0.04                                 |
| 7                     | 2            | 14654                             | -0.11                                 | 0.11                                  |
| 8                     | 2            | 14867                             | 0.09                                  | -0.06                                 |
| 9                     | 2            | 18501                             | 0.18                                  | -0.03                                 |
| 10                    | 2            | 18551                             | -0.01                                 | 0.01                                  |
| 11                    | 2            | 20720                             | 8.02                                  | -0.40                                 |
| 12                    | 2            | 21186                             | 2.09                                  | -0.11                                 |
| 13                    | 2            | 21272                             | 0.30                                  | 0.06                                  |
| 14                    | 4            | 21570                             | 0.09                                  | -0.09                                 |
| 15                    | 2            | 21731                             | 0.03                                  | -1.20                                 |

|    |   |       |       |       |
|----|---|-------|-------|-------|
| 16 | 2 | 21917 | -1.50 | 1.50  |
| 17 | 4 | 22409 | 0.07  | 0.07  |
| 18 | 2 | 22629 | 0.00  | 0.00  |
| 19 | 4 | 22751 | 0.01  | -0.01 |
| 20 | 2 | 23628 | 0.00  | 0.00  |
| 21 | 2 | 24591 | 0.00  | 0.00  |
| 22 | 2 | 27170 | 0.01  | -0.01 |
| 23 | 2 | 27270 | 0.00  | 0.00  |
| 24 | 2 | 29624 | -0.14 | 0.12  |
| 25 | 2 | 29852 | -0.15 | 0.11  |
| 26 | 2 | 30120 | -0.11 | 0.06  |
| 27 | 2 | 30130 | -0.23 | -0.21 |
| 28 | 2 | 31474 | 0.03  | -0.02 |
| 29 | 2 | 31770 | -0.02 | 0.02  |
| 30 | 2 | 32112 | 1.28  | 0.00  |
| 31 | 2 | 32545 | -0.02 | -0.02 |
| 32 | 2 | 32587 | -0.01 | 0.01  |
| 33 | 2 | 33291 | 0.00  | 0.00  |
| 34 | 2 | 33663 | -0.26 | 0.26  |
| 35 | 2 | 34001 | -0.13 | -0.17 |
| 36 | 2 | 35392 | -0.37 | -0.36 |
| 37 | 2 | 35673 | -0.42 | 0.41  |
| 38 | 2 | 42825 | -0.09 | -0.05 |
| 39 | 2 | 42887 | -0.08 | 0.01  |
| 40 | 2 | 43538 | -0.08 | -0.11 |
| 41 | 2 | 43715 | -0.12 | 0.12  |
| 42 | 2 | 44203 | -0.01 | 0.01  |
| 43 | 2 | 44324 | 0.00  | 0.00  |
| 44 | 2 | 44478 | -0.01 | 0.01  |
| 45 | 2 | 64018 | 0.00  | 0.00  |
| 46 | 2 | 64309 | 0.00  | 0.00  |
| 47 | 2 | 64618 | 0.09  | 0.00  |
| 48 | 2 | 65647 | 0.06  | 0.00  |
| 49 | 2 | 65655 | 0.03  | 0.00  |

**Table S19.** Comparison of the calculated parameter for the magnetic anisotropy of  $[\text{Co}(\text{L}_1)] \cdot 2\text{ClO}_4$  (**6**) at different levels of theory.

| Calculated parameters  | CASSCF | NEVPT2 | Experimental values |
|------------------------|--------|--------|---------------------|
| D ( $\text{cm}^{-1}$ ) | 37.17  | 31.34  | 26.00               |
| E/D                    | 0.15   | 0.14   | 0.00                |
| $g_z$                  | 2.05   | 2.23   | -                   |
| $g_y$                  | 2.36   | 2.27   | -                   |
| $g_x$                  | 2.47   | 2.36   | -                   |
| $g_{\text{iso}}$       | 2.29   | 2.29   | 2.15                |

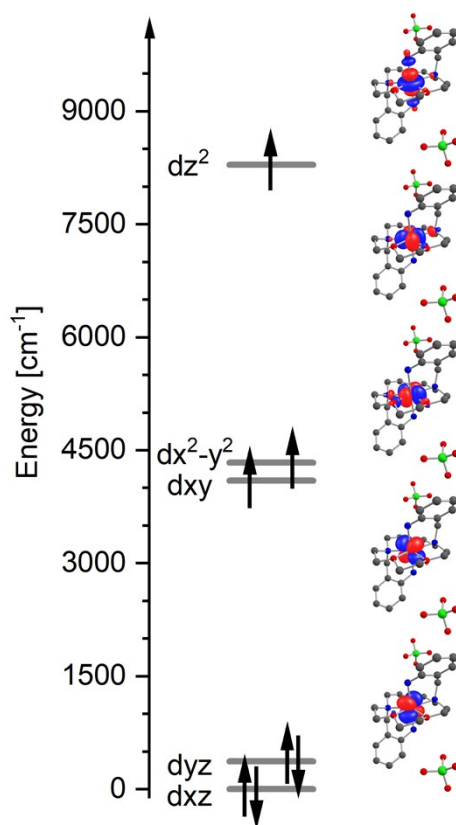

**Figure S7.** AILFT orbital energy diagram for  $[\text{Co}(\text{L}_1)] \cdot 2\text{ClO}_4$  (**6**).

**Table S20.** Details of the major contributing excitations that lead to the D- and E-values (NEVPT2 level of theory) calculated for [Co(L<sub>1</sub>)]·2ClO<sub>4</sub> (**6**).

| NEVPT2 excited states | NEVPT2 energy (cm <sup>-1</sup> ) | %  | Major electronic configuration |                       |                        |                                                 |                                   | Contribution to D (cm <sup>-1</sup> ) | Contribution to E (cm <sup>-1</sup> ) |
|-----------------------|-----------------------------------|----|--------------------------------|-----------------------|------------------------|-------------------------------------------------|-----------------------------------|---------------------------------------|---------------------------------------|
|                       |                                   |    | d <sub>xz</sub> (0)            | d <sub>yz</sub> (372) | d <sub>xy</sub> (4061) | d <sub>x<sup>2</sup>-y<sup>2</sup></sub> (4335) | d <sub>z<sup>2</sup></sub> (8286) |                                       |                                       |
| 0                     | 0                                 | 84 | 2                              | 2                     | 1                      | 1                                               | 1                                 | 0.00                                  | 0.00                                  |
|                       |                                   | 10 | 1                              | 1                     | 2                      | 2                                               | 1                                 |                                       |                                       |
| 1                     | 3607                              | 57 | 1                              | 2                     | 2                      | 1                                               | 1                                 | -0.10                                 | 3.03                                  |
|                       |                                   | 30 | 2                              | 1                     | 1                      | 2                                               | 1                                 |                                       |                                       |
| 2                     | 3992                              | 52 | 1                              | 2                     | 1                      | 2                                               | 1                                 | 0.39                                  | -0.41                                 |
|                       |                                   | 39 | 2                              | 1                     | 2                      | 1                                               | 1                                 |                                       |                                       |
| 3                     | 5197                              | 32 | 2                              | 1                     | 1                      | 2                                               | 1                                 | 13.62                                 | 14.09                                 |
|                       |                                   | 23 | 1                              | 2                     | 1                      | 2                                               | 1                                 |                                       |                                       |
|                       |                                   | 18 | 1                              | 2                     | 1                      | 1                                               | 2                                 |                                       |                                       |
|                       |                                   | 17 | 2                              | 1                     | 2                      | 1                                               | 1                                 |                                       |                                       |
| 4                     | 6130                              | 27 | 1                              | 2                     | 2                      | 1                                               | 1                                 | 12.59                                 | -12.58                                |
|                       |                                   | 20 | 2                              | 1                     | 1                      | 2                                               | 1                                 |                                       |                                       |
|                       |                                   | 20 | 2                              | 1                     | 1                      | 1                                               | 2                                 |                                       |                                       |
|                       |                                   | 18 | 2                              | 1                     | 2                      | 1                                               | 1                                 |                                       |                                       |
| 11                    | 20663                             | 24 | 2                              | 2                     | 2                      | 0                                               | 1                                 | 9.10                                  | -0.34                                 |
|                       |                                   | 22 | 2                              | 2                     | 0                      | 2                                               | 1                                 |                                       |                                       |

**Table S21.** Computed NEVPT2 transition energies and state-wise contribution to the axial and rhombic ZFS parameters of [Co(L<sub>1</sub>)]·2ClO<sub>4</sub> (**6**).

| NEVPT2 excited states | Multiplicity | NEVPT2 energy (cm <sup>-1</sup> ) | Contribution to D (cm <sup>-1</sup> ) | Contribution to E (cm <sup>-1</sup> ) |
|-----------------------|--------------|-----------------------------------|---------------------------------------|---------------------------------------|
| 0                     | 4            | 0                                 | 0.00                                  | 0.00                                  |
| 1                     | 4            | 3607                              | -0.10                                 | 3.03                                  |
| 2                     | 4            | 3992                              | 0.39                                  | -0.41                                 |
| 3                     | 4            | 5197                              | 13.62                                 | 14.09                                 |
| 4                     | 4            | 6130                              | 12.59                                 | -12.58                                |
| 5                     | 4            | 13286                             | 0.05                                  | 0.05                                  |
| 6                     | 4            | 13575                             | 0.04                                  | -0.04                                 |
| 7                     | 2            | 14715                             | -0.11                                 | 0.11                                  |
| 8                     | 2            | 14915                             | 0.10                                  | -0.06                                 |
| 9                     | 2            | 18500                             | 0.16                                  | -0.02                                 |
| 10                    | 2            | 18546                             | -0.01                                 | 0.01                                  |
| 11                    | 2            | 20663                             | 9.10                                  | -0.34                                 |
| 12                    | 2            | 21272                             | 1.24                                  | -0.15                                 |
| 13                    | 2            | 21295                             | 0.27                                  | 0.06                                  |
| 14                    | 4            | 21564                             | 0.09                                  | -0.09                                 |
| 15                    | 2            | 21758                             | -0.08                                 | -1.22                                 |

|    |   |       |       |       |
|----|---|-------|-------|-------|
| 16 | 2 | 21948 | -1.50 | 1.50  |
| 17 | 4 | 22389 | 0.07  | 0.07  |
| 18 | 2 | 22635 | 0.00  | 0.00  |
| 19 | 4 | 22805 | 0.01  | -0.01 |
| 20 | 2 | 23675 | 0.00  | 0.00  |
| 21 | 2 | 24638 | 0.00  | 0.00  |
| 22 | 2 | 27183 | 0.01  | -0.01 |
| 23 | 2 | 27285 | 0.00  | 0.00  |
| 24 | 2 | 29577 | -0.15 | 0.13  |
| 25 | 2 | 29825 | -0.16 | 0.12  |
| 26 | 2 | 30100 | -0.23 | -0.22 |
| 27 | 2 | 30158 | -0.09 | 0.05  |
| 28 | 2 | 31475 | 0.02  | -0.02 |
| 29 | 2 | 31752 | -0.02 | 0.01  |
| 30 | 2 | 32120 | 1.28  | 0.00  |
| 31 | 2 | 32551 | -0.02 | -0.02 |
| 32 | 2 | 32598 | -0.01 | 0.01  |
| 33 | 2 | 33318 | 0.00  | 0.00  |
| 34 | 2 | 33680 | -0.26 | 0.26  |
| 35 | 2 | 34014 | -0.13 | -0.17 |
| 36 | 2 | 35399 | -0.37 | -0.36 |
| 37 | 2 | 35680 | -0.42 | 0.41  |
| 38 | 2 | 42843 | -0.08 | -0.04 |
| 39 | 2 | 42895 | -0.07 | 0.00  |
| 40 | 2 | 43544 | -0.09 | -0.11 |
| 41 | 2 | 43725 | -0.12 | 0.12  |
| 42 | 2 | 44231 | 0.00  | 0.00  |
| 43 | 2 | 44326 | 0.00  | 0.00  |
| 44 | 2 | 44477 | -0.01 | 0.01  |
| 45 | 2 | 64035 | 0.00  | 0.00  |
| 46 | 2 | 64305 | 0.00  | 0.00  |
| 47 | 2 | 64629 | 0.08  | 0.00  |
| 48 | 2 | 65636 | 0.00  | 0.01  |
| 49 | 2 | 65691 | 0.10  | 0.00  |

**Table S22.** Comparison of the calculated parameter for the magnetic anisotropy of  $[\text{Co}(\text{L}_2)]^{2+}$  (**7**) at different levels of theory.

| Calculated parameters  | CASSCF | NEVPT2 | Experimental values |
|------------------------|--------|--------|---------------------|
| D ( $\text{cm}^{-1}$ ) | 34.46  | 30.49  | 23.10               |
| E/D                    | 0.14   | 0.12   | -                   |
| $g_z$                  | 2.15   | 2.1    | -                   |
| $g_y$                  | 2.41   | 2.34   | -                   |
| $g_x$                  | 2.53   | 2.42   | -                   |
| $g_{\text{iso}}$       | 2.36   | 2.29   | 2.21                |

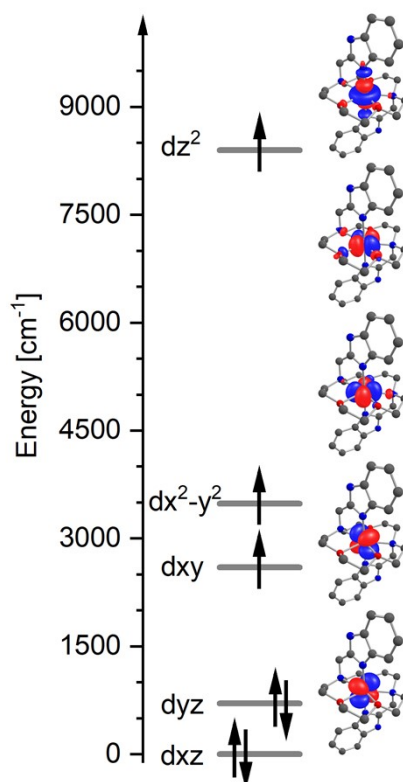

**Figure S8.** AILFT orbital energy diagram for  $[\text{Co}(\text{L}_2)]^{2+}$  (**7**).



**Table S23.** Details of the major contributing excitations that lead to the D- and E-values (NEVPT2 level of theory) calculated for  $[\text{Co}(\text{L}_2)]^{2+}$  (**7**).

| NEVPT2 excited states | NEVPT2 energy ( $\text{cm}^{-1}$ ) | %  | Major electronic configuration |                |                 |                      |                  | Contribution to D ( $\text{cm}^{-1}$ ) | Contribution to E ( $\text{cm}^{-1}$ ) |
|-----------------------|------------------------------------|----|--------------------------------|----------------|-----------------|----------------------|------------------|----------------------------------------|----------------------------------------|
|                       |                                    |    | $d_{xz}$ (0)                   | $d_{yz}$ (707) | $d_{xy}$ (2600) | $d_{x^2-y^2}$ (3486) | $d_{z^2}$ (8399) |                                        |                                        |
| $^4A_2'$              | 0                                  | 73 | 2                              | 2              | 1               | 1                    | 1                | 0.00                                   | 0.00                                   |
|                       |                                    | 11 | 1                              | 1              | 2               | 2                    | 1                |                                        |                                        |
| $^4E_2''$             | 2033                               | 51 | 1                              | 2              | 2               | 1                    | 1                | -1.30                                  | 5.06                                   |
|                       |                                    | 26 | 2                              | 1              | 1               | 2                    | 1                |                                        |                                        |
|                       |                                    | 18 | 2                              | 1              | 2               | 1                    | 1                |                                        |                                        |
|                       | 2582                               | 44 | 1                              | 2              | 1               | 2                    | 1                | -0.29                                  | -0.08                                  |
| 37                    |                                    | 2  | 1                              | 2              | 1               | 1                    |                  |                                        |                                        |
| $^4E_1''$             | 4644                               | 46 | 2                              | 1              | 1               | 2                    | 1                | 13.73                                  | 12.96                                  |
|                       |                                    | 15 | 2                              | 1              | 1               | 1                    | 2                |                                        |                                        |
|                       |                                    | 14 | 1                              | 2              | 1               | 2                    | 1                |                                        |                                        |
| $^4E_1''$             | 4753                               | 25 | 1                              | 2              | 1               | 2                    | 1                | 15.41                                  | -14.17                                 |
|                       |                                    | 19 | 1                              | 2              | 2               | 1                    | 1                |                                        |                                        |
|                       |                                    | 15 | 2                              | 1              | 2               | 1                    | 1                |                                        |                                        |
|                       |                                    | 14 | 1                              | 2              | 1               | 1                    | 2                |                                        |                                        |
|                       |                                    | 34 | 2                              | 2              | 1               | 1                    | 1                |                                        |                                        |
| $^2A_1'$              | 20708                              | 46 | 2                              | 2              | 0               | 2                    | 1                | 7.74                                   | -0.11                                  |
|                       |                                    | 11 | 0                              | 2              | 2               | 2                    | 1                |                                        |                                        |

**Table S24.** Computed NEVPT2 transition energies and state-wise contribution to the axial and rhombic ZFS parameters of  $[\text{Co}(\text{L}_2)]^{2+}$  (**7**).

| NEVPT2 excited states | Multiplicity | NEVPT2 energy ( $\text{cm}^{-1}$ ) | Contribution to D ( $\text{cm}^{-1}$ ) | Contribution to E ( $\text{cm}^{-1}$ ) |
|-----------------------|--------------|------------------------------------|----------------------------------------|----------------------------------------|
| 0                     | 4            | 0                                  | 0.00                                   | 0.00                                   |
| 1                     | 4            | 2033                               | -1.30                                  | 5.06                                   |
| 2                     | 4            | 2582                               | -0.29                                  | -0.08                                  |
| 3                     | 4            | 4644                               | 13.73                                  | 12.96                                  |
| 4                     | 4            | 4753                               | 15.41                                  | -14.17                                 |
| 5                     | 4            | 11276                              | 0.17                                   | 0.13                                   |
| 6                     | 4            | 12622                              | 0.05                                   | -0.04                                  |
| 7                     | 2            | 13121                              | -0.24                                  | 0.21                                   |
| 8                     | 2            | 14263                              | -0.07                                  | -0.06                                  |
| 9                     | 2            | 18128                              | 2.60                                   | -0.11                                  |
| 10                    | 2            | 18766                              | 0.00                                   | 0.00                                   |
| 11                    | 4            | 19642                              | 0.02                                   | -0.02                                  |
| 12                    | 2            | 19800                              | -0.32                                  | -1.02                                  |
| 13                    | 2            | 20314                              | -1.12                                  | 1.11                                   |

|    |   |       |       |       |
|----|---|-------|-------|-------|
| 14 | 2 | 20354 | -0.51 | 0.58  |
| 15 | 2 | 20572 | -0.35 | -0.55 |
| 16 | 2 | 20708 | 7.74  | -0.11 |
| 17 | 4 | 21787 | 0.09  | 0.09  |
| 18 | 2 | 21880 | 0.00  | 0.00  |
| 19 | 4 | 22186 | 0.11  | -0.11 |
| 20 | 2 | 22519 | 0.05  | 0.00  |
| 21 | 2 | 22657 | 0.00  | 0.00  |
| 22 | 2 | 26156 | 0.00  | 0.00  |
| 23 | 2 | 26272 | -0.02 | -0.04 |
| 24 | 2 | 28312 | -0.14 | 0.13  |
| 25 | 2 | 29475 | 0.00  | -0.01 |
| 26 | 2 | 29960 | 0.09  | 0.01  |
| 27 | 2 | 30167 | -0.15 | -0.06 |
| 28 | 2 | 30196 | -0.02 | 0.02  |
| 29 | 2 | 30534 | -0.15 | -0.02 |
| 30 | 2 | 30787 | 1.41  | -0.01 |
| 31 | 2 | 30981 | -0.01 | 0.01  |
| 32 | 2 | 31474 | 0.00  | -0.02 |
| 33 | 2 | 31582 | 0.10  | 0.01  |
| 34 | 2 | 32124 | -0.29 | 0.28  |
| 35 | 2 | 32367 | -0.03 | -0.11 |
| 36 | 2 | 33246 | -0.57 | -0.57 |
| 37 | 2 | 34029 | -0.43 | 0.43  |
| 38 | 2 | 41726 | -0.24 | -0.25 |
| 39 | 2 | 41958 | -0.16 | 0.16  |
| 40 | 2 | 42294 | -0.10 | 0.10  |
| 41 | 2 | 42987 | 0.04  | 0.00  |
| 42 | 2 | 43045 | 0.00  | 0.00  |
| 43 | 2 | 43584 | 0.00  | -0.01 |
| 44 | 2 | 43853 | 0.00  | 0.00  |
| 45 | 2 | 62271 | 0.11  | -0.01 |
| 46 | 2 | 62865 | 0.00  | 0.00  |
| 47 | 2 | 63381 | 0.07  | 0.00  |
| 48 | 2 | 64942 | 0.00  | 0.00  |
| 49 | 2 | 65293 | -0.01 | 0.01  |

**Table S25.** Comparison of the calculated parameter for the magnetic anisotropy of  $[\text{Co}(\text{L}_3)(\text{H}_2\text{O})_2]^{2+}$  (**8**) at different levels of theory.

| Calculated parameters  | CASSCF | NEVPT2 | Experimental values |
|------------------------|--------|--------|---------------------|
| D ( $\text{cm}^{-1}$ ) | 41.53  | 35.15  | 24.60               |
| E/D                    | 0.02   | 0.02   | 0.00                |
| $g_z$                  | 2.00   | 2.00   | -                   |
| $g_y$                  | 2.38   | 2.3    | -                   |
| $g_x$                  | 2.40   | 2.31   | -                   |
| $g_{\text{iso}}$       | 2.26   | 2.20   | 2.29                |

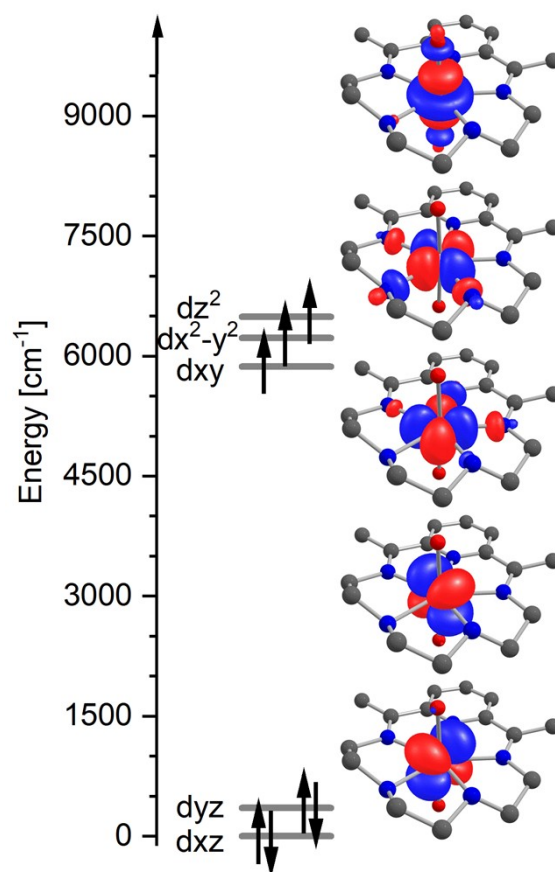

**Figure S9.** AILFT orbital energy diagram for  $[\text{Co}(\text{L}_3)(\text{H}_2\text{O})_2]^{2+}$  (**8**).

**Table S26.** Details of the major contributing excitations that lead to the D- and E-values (NEVPT2 level of theory) calculated for  $[\text{Co}(\text{L}_3)(\text{H}_2\text{O})_2]^{2+}$  (**8**).

| NEVPT2 excited states       | NEVPT2 energy (cm <sup>-1</sup> ) | %  | Major electronic configuration |                       |                        |                                                 |                                   | Contribution to D (cm <sup>-1</sup> ) | Contribution to E (cm <sup>-1</sup> ) |
|-----------------------------|-----------------------------------|----|--------------------------------|-----------------------|------------------------|-------------------------------------------------|-----------------------------------|---------------------------------------|---------------------------------------|
|                             |                                   |    | d <sub>xz</sub> (0)            | d <sub>yz</sub> (353) | d <sub>xy</sub> (5866) | d <sub>x<sup>2</sup>-y<sup>2</sup></sub> (6224) | d <sub>z<sup>2</sup></sub> (6492) |                                       |                                       |
| <sup>4</sup> A <sub>2</sub> | 0                                 | 90 | 2                              | 2                     | 1                      | 1                                               | 1                                 | 0.00                                  | 0.00                                  |
| <sup>4</sup> B <sub>1</sub> | 5521.9                            | 43 | 2                              | 1                     | 2                      | 1                                               | 1                                 | 8.45                                  | 2.08                                  |
|                             |                                   | 30 | 1                              | 2                     | 2                      | 1                                               | 1                                 |                                       |                                       |
|                             |                                   | 14 | 2                              | 1                     | 1                      | 1                                               | 2                                 |                                       |                                       |
| <sup>4</sup> B <sub>2</sub> | 5780.2                            | 34 | 2                              | 1                     | 2                      | 1                                               | 1                                 | 12.01                                 | 2.12                                  |
|                             |                                   | 28 | 1                              | 2                     | 2                      | 1                                               | 1                                 |                                       |                                       |
|                             |                                   | 18 | 2                              | 1                     | 1                      | 1                                               | 2                                 |                                       |                                       |
|                             |                                   | 15 | 1                              | 2                     | 1                      | 1                                               | 2                                 |                                       |                                       |
| <sup>4</sup> B <sub>1</sub> | 6201.4                            | 69 | 2                              | 1                     | 1                      | 2                                               | 1                                 | 1.51                                  | 1.59                                  |
|                             |                                   | 22 | 1                              | 2                     | 2                      | 1                                               | 1                                 |                                       |                                       |
| <sup>4</sup> B <sub>1</sub> | 6458.6                            | 73 | 1                              | 2                     | 1                      | 2                                               | 1                                 | 6.02                                  | -5.13                                 |
|                             |                                   | 17 | 1                              | 2                     | 1                      | 1                                               | 2                                 |                                       |                                       |
| <sup>2</sup> A <sub>1</sub> | 20905.5                           | 50 | 2                              | 2                     | 0                      | 2                                               | 1                                 | 13.17                                 | -0.01                                 |
|                             |                                   | 24 | 2                              | 2                     | 2                      | 0                                               | 1                                 |                                       |                                       |

**Table S27.** Computed NEVPT2 transition energies and state-wise contribution to the axial and rhombic ZFS parameters of  $[\text{Co}(\text{L}_3)(\text{H}_2\text{O})_2]^{2+}$  (**8**).

| NEVPT2 excited states | Multiplicity | NEVPT2 energy (cm <sup>-1</sup> ) | Contribution to D (cm <sup>-1</sup> ) | Contribution to E (cm <sup>-1</sup> ) |
|-----------------------|--------------|-----------------------------------|---------------------------------------|---------------------------------------|
| 0                     | 4            | 0                                 | 0.00                                  | 0.00                                  |
| 1                     | 4            | 5522                              | 8.45                                  | 2.08                                  |
| 2                     | 4            | 5780                              | 12.01                                 | 2.12                                  |
| 3                     | 4            | 6201                              | 1.51                                  | 1.59                                  |
| 4                     | 4            | 6459                              | 6.02                                  | -5.13                                 |
| 5                     | 4            | 12966                             | 0.01                                  | 0.00                                  |
| 6                     | 4            | 13844                             | 0.01                                  | 0.00                                  |
| 7                     | 2            | 17868                             | 0.49                                  | 0.00                                  |
| 8                     | 2            | 18055                             | 0.00                                  | 0.00                                  |
| 9                     | 2            | 18356                             | -0.02                                 | 0.00                                  |
| 10                    | 2            | 18921                             | 0.04                                  | 0.00                                  |
| 11                    | 4            | 20807                             | 0.02                                  | -0.01                                 |
| 12                    | 2            | 20906                             | 13.17                                 | -0.01                                 |
| 13                    | 4            | 21244                             | 0.03                                  | 0.01                                  |
| 14                    | 2            | 22646                             | 0.00                                  | 0.00                                  |

|    |   |       |       |       |
|----|---|-------|-------|-------|
| 15 | 2 | 22818 | 0.00  | 0.00  |
| 16 | 2 | 22825 | 0.05  | 0.00  |
| 17 | 2 | 23506 | -1.50 | -0.63 |
| 18 | 2 | 23634 | -1.43 | 0.58  |
| 19 | 4 | 26887 | 0.00  | 0.00  |
| 20 | 2 | 27362 | -0.07 | 0.04  |
| 21 | 2 | 27444 | -0.11 | -0.07 |
| 22 | 2 | 27651 | -0.05 | -0.02 |
| 23 | 2 | 27666 | -0.03 | -0.03 |
| 24 | 2 | 27709 | -0.09 | 0.04  |
| 25 | 2 | 27921 | -0.01 | 0.00  |
| 26 | 2 | 28799 | -0.47 | 0.39  |
| 27 | 2 | 29099 | -0.38 | -0.34 |
| 28 | 2 | 31166 | 0.00  | 0.00  |
| 29 | 2 | 31672 | 0.00  | 0.00  |
| 30 | 2 | 32546 | 1.09  | 0.00  |
| 31 | 2 | 32585 | 0.04  | 0.00  |
| 32 | 2 | 32648 | 0.00  | 0.00  |
| 33 | 2 | 34218 | -0.21 | 0.10  |
| 34 | 2 | 34475 | -0.09 | -0.05 |
| 35 | 2 | 34917 | -0.01 | -0.01 |
| 36 | 2 | 35289 | -0.26 | -0.01 |
| 37 | 2 | 35622 | -0.37 | 0.00  |
| 38 | 2 | 42679 | 0.00  | 0.00  |
| 39 | 2 | 42687 | 0.01  | 0.00  |
| 40 | 2 | 44401 | -0.01 | 0.00  |
| 41 | 2 | 44687 | -0.02 | 0.00  |
| 42 | 2 | 46050 | -0.11 | -0.03 |
| 43 | 2 | 46077 | -0.10 | 0.03  |
| 44 | 2 | 46562 | 0.00  | 0.00  |
| 45 | 2 | 63579 | 0.00  | 0.00  |
| 46 | 2 | 63748 | 0.00  | 0.00  |
| 47 | 2 | 66118 | 0.00  | 0.00  |
| 48 | 2 | 66342 | 0.00  | 0.00  |
| 49 | 2 | 68569 | 0.20  | 0.00  |

**Table S28.** Comparison of the calculated parameter for the magnetic anisotropy of  $[\text{Co}(\text{L}_4)\text{Cl}_2]$  (**9**) at different levels of theory.

| Calculated parameters    | CASSCF | NEVPT2 | Experimental values |
|--------------------------|--------|--------|---------------------|
| $D$ ( $\text{cm}^{-1}$ ) | 56.97  | 47.30  | 40.10               |
| $E/D$                    | 0.05   | 0.03   | 0.00                |
| $g_z$                    | 2.01   | 2.01   | 2.48                |
| $g_y$                    | 2.55   | 2.43   | 2.48                |
| $g_x$                    | 2.60   | 2.48   | 2.00                |
| $g_{\text{iso}}$         | 2.38   | 2.31   | 2.32                |

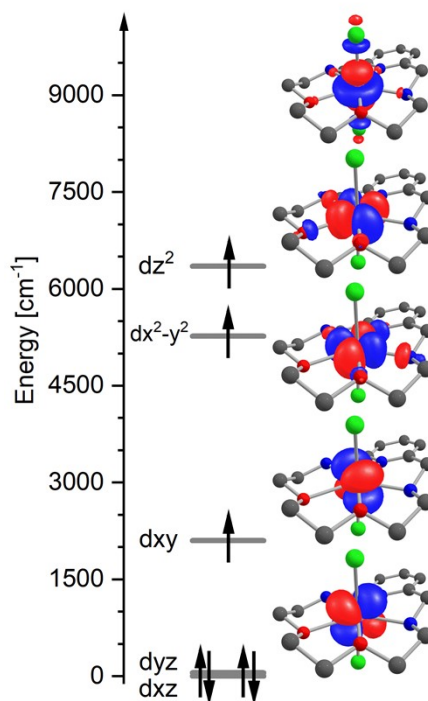

**Figure S10.** AILFT orbital energy diagram for  $[\text{Co}(\text{L}_4)\text{Cl}_2]$  (**9**).

**Table S29.** Details of the major contributing excitations that lead to the D- and E-values (NEVPT2 level of theory) calculated for [Co(L<sub>4</sub>)Cl<sub>2</sub>] (**9**).

| NEVPT2 excited states       | NEVPT2 energy (cm <sup>-1</sup> ) | %  | Major electronic configuration |                      |                        |                                                 |                                   | Contribution to D (cm <sup>-1</sup> ) | Contribution to E (cm <sup>-1</sup> ) |
|-----------------------------|-----------------------------------|----|--------------------------------|----------------------|------------------------|-------------------------------------------------|-----------------------------------|---------------------------------------|---------------------------------------|
|                             |                                   |    | d <sub>xz</sub> (0)            | d <sub>yz</sub> (53) | d <sub>xy</sub> (2102) | d <sub>x<sup>2</sup>-y<sup>2</sup></sub> (5267) | d <sub>z<sup>2</sup></sub> (6348) |                                       |                                       |
| <sup>4</sup> A <sub>2</sub> | 0                                 | 77 | 2                              | 2                    | 1                      | 1                                               | 1                                 | 0.00                                  | 0.00                                  |
| <sup>4</sup> B <sub>1</sub> | 2177                              | 54 | 1                              | 2                    | 1                      | 2                                               | 1                                 | 12.01                                 | -10.88                                |
|                             |                                   | 16 | 2                              | 1                    | 1                      | 2                                               | 1                                 |                                       |                                       |
|                             |                                   | 14 | 2                              | 1                    | 2                      | 1                                               | 1                                 |                                       |                                       |
| <sup>4</sup> B <sub>2</sub> | 2269                              | 49 | 2                              | 1                    | 1                      | 2                                               | 1                                 | 12.28                                 | 12.30                                 |
|                             |                                   | 17 | 1                              | 2                    | 1                      | 2                                               | 1                                 |                                       |                                       |
|                             |                                   | 15 | 1                              | 2                    | 2                      | 1                                               | 1                                 |                                       |                                       |
| <sup>4</sup> B <sub>1</sub> | 5280                              | 43 | 1                              | 2                    | 2                      | 1                                               | 1                                 | 8.60                                  | 9.66                                  |
|                             |                                   | 17 | 2                              | 1                    | 2                      | 1                                               | 1                                 |                                       |                                       |
|                             |                                   | 16 | 1                              | 2                    | 1                      | 1                                               | 2                                 |                                       |                                       |
| <sup>4</sup> B <sub>2</sub> | 6005                              | 40 | 2                              | 1                    | 2                      | 1                                               | 1                                 | 9.12                                  | -8.96                                 |
|                             |                                   | 19 | 1                              | 2                    | 2                      | 1                                               | 1                                 |                                       |                                       |
|                             |                                   | 17 | 2                              | 1                    | 1                      | 1                                               | 2                                 |                                       |                                       |
|                             |                                   | 10 | 2                              | 1                    | 1                      | 2                                               | 1                                 |                                       |                                       |
| <sup>2</sup> A <sub>1</sub> | 15539                             | 45 | 2                              | 2                    | 0                      | 2                                               | 1                                 | 5.24                                  | -0.12                                 |
|                             |                                   | 30 | 2                              | 2                    | 1                      | 1                                               | 1                                 |                                       |                                       |
| <sup>2</sup> A <sub>1</sub> | 22404                             | 38 | 2                              | 2                    | 2                      | 0                                               | 1                                 | 6.27                                  | -0.01                                 |
|                             |                                   | 16 | 1                              | 1                    | 1                      | 2                                               | 2                                 |                                       |                                       |
|                             |                                   | 12 | 2                              | 2                    | 1                      | 1                                               | 1                                 |                                       |                                       |

**Table S30.** Computed NEVPT2 transition energies and state-wise contribution to the axial and rhombic ZFS parameters of [Co(L<sub>4</sub>)Cl<sub>2</sub>] (**9**).

| NEVPT2 excited states | Multiplicity | NEVPT2 energy (cm <sup>-1</sup> ) | Contribution to D (cm <sup>-1</sup> ) | Contribution to E (cm <sup>-1</sup> ) |
|-----------------------|--------------|-----------------------------------|---------------------------------------|---------------------------------------|
| 0                     | 4            | 0                                 | 0.00                                  | 0.00                                  |
| 1                     | 4            | 2177                              | 12.01                                 | -10.88                                |
| 2                     | 4            | 2269                              | 12.28                                 | 12.30                                 |
| 3                     | 4            | 5280                              | 8.60                                  | 9.66                                  |
| 4                     | 4            | 6005                              | 9.12                                  | -8.96                                 |
| 5                     | 4            | 9071                              | 0.09                                  | -0.08                                 |
| 6                     | 4            | 13038                             | 0.00                                  | 0.01                                  |
| 7                     | 2            | 14086                             | 0.67                                  | -0.04                                 |
| 8                     | 2            | 15539                             | 5.24                                  | -0.12                                 |
| 9                     | 2            | 17499                             | -0.02                                 | 0.02                                  |
| 10                    | 2            | 18365                             | -0.01                                 | 0.00                                  |

|    |   |       |       |       |
|----|---|-------|-------|-------|
| 11 | 2 | 19927 | -0.03 | 0.03  |
| 12 | 4 | 20201 | 0.04  | -0.04 |
| 13 | 2 | 20399 | -0.01 | -0.08 |
| 14 | 2 | 20438 | -1.43 | -1.46 |
| 15 | 2 | 20481 | -1.49 | 1.48  |
| 16 | 4 | 20690 | 0.04  | 0.04  |
| 17 | 4 | 21721 | 0.00  | 0.00  |
| 18 | 2 | 22124 | 0.00  | 0.00  |
| 19 | 2 | 22404 | 6.27  | -0.01 |
| 20 | 2 | 23419 | 0.00  | 0.00  |
| 21 | 2 | 23525 | -0.05 | -0.05 |
| 22 | 2 | 26671 | -0.31 | 0.29  |
| 23 | 2 | 26771 | -0.17 | -0.17 |
| 24 | 2 | 26975 | -0.08 | -0.04 |
| 25 | 2 | 27220 | -0.06 | -0.01 |
| 26 | 2 | 28130 | 0.00  | 0.00  |
| 27 | 2 | 29544 | -0.02 | 0.01  |
| 28 | 2 | 29692 | 0.83  | -0.03 |
| 29 | 2 | 30139 | -0.12 | 0.15  |
| 30 | 2 | 30455 | -0.07 | -0.14 |
| 31 | 2 | 30485 | 0.00  | -0.01 |
| 32 | 2 | 31425 | 1.32  | 0.00  |
| 33 | 2 | 31809 | -0.11 | -0.11 |
| 34 | 2 | 32144 | -0.24 | 0.23  |
| 35 | 2 | 32394 | -0.01 | 0.01  |
| 36 | 2 | 32988 | -0.39 | 0.20  |
| 37 | 2 | 33060 | -0.44 | -0.24 |
| 38 | 2 | 41503 | 0.00  | -0.03 |
| 39 | 2 | 41846 | 0.00  | 0.00  |
| 40 | 2 | 42040 | -0.08 | 0.08  |
| 41 | 2 | 42297 | -0.16 | -0.06 |
| 42 | 2 | 42399 | -0.12 | 0.00  |
| 43 | 2 | 42802 | 0.00  | 0.00  |
| 44 | 2 | 43359 | 0.00  | 0.00  |
| 45 | 2 | 62831 | -0.01 | -0.01 |
| 46 | 2 | 62831 | 0.00  | 0.00  |
| 47 | 2 | 62860 | 0.00  | 0.00  |
| 48 | 2 | 63181 | 0.00  | 0.00  |
| 49 | 2 | 64060 | 0.20  | 0.00  |



**Table S31.** Comparison of the calculated parameter for the magnetic anisotropy of  $[\text{Co}(\text{L}_5\text{H}_2)\text{I}(\text{H}_2\text{O})]$  (**10**) at different levels of theory.

| Calculated parameters  | CASSCF | NEVPT2 | Experimental values |
|------------------------|--------|--------|---------------------|
| D ( $\text{cm}^{-1}$ ) | 44.11  | 36.97  | 30.00               |
| E/D                    | 0.03   | 0.03   | 0.01                |
| $g_z$                  | 1.99   | 2.00   | -                   |
| $g_y$                  | 2.43   | 2.32   | -                   |
| $g_x$                  | 2.48   | 2.34   | -                   |
| $g_{\text{iso}}$       | 2.30   | 2.24   | 2.24                |

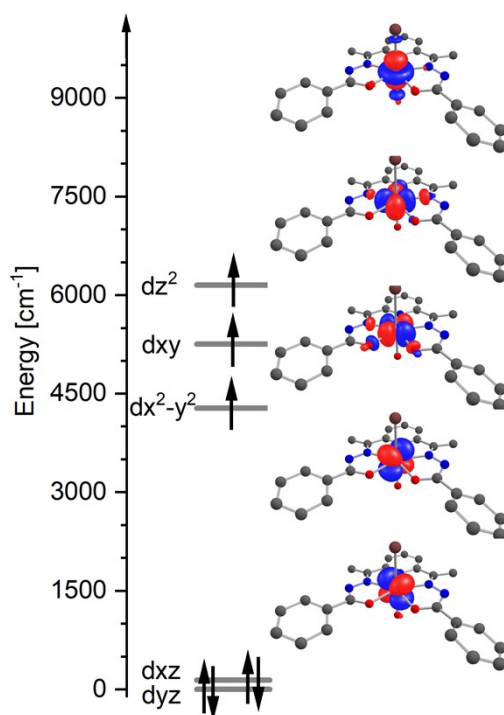

**Figure S11.** AILFT orbital energy diagram for  $[\text{Co}(\text{L}_5\text{H}_2)\text{I}(\text{H}_2\text{O})]^+$  (**10**).

**Table S32.** Details of the major contributing excitations that lead to the D- and E-values (NEVPT2 level of theory) calculated for  $[\text{Co}(\text{L}_5\text{H}_2)\text{I}(\text{H}_2\text{O})]^+$  (**10**).

| NEVPT2 excited states       | NEVPT2 energy (cm <sup>-1</sup> ) | %  | Major electronic configuration |                       |                        |                                                 |                                   | Contribution to D (cm <sup>-1</sup> ) | Contribution to E (cm <sup>-1</sup> ) |
|-----------------------------|-----------------------------------|----|--------------------------------|-----------------------|------------------------|-------------------------------------------------|-----------------------------------|---------------------------------------|---------------------------------------|
|                             |                                   |    | d <sub>xz</sub> (0)            | d <sub>yz</sub> (144) | d <sub>xy</sub> (4277) | d <sub>x<sup>2</sup>-y<sup>2</sup></sub> (5254) | d <sub>z<sup>2</sup></sub> (6152) |                                       |                                       |
| <sup>4</sup> A <sub>2</sub> | 0                                 | 89 | 2                              | 2                     | 1                      | 1                                               | 1                                 | 0.00                                  | 0.00                                  |
| <sup>4</sup> B <sub>1</sub> | 4222                              | 77 | 2                              | 1                     | 1                      | 2                                               | 1                                 | 3.77                                  | -2.79                                 |
|                             |                                   | 13 | 2                              | 1                     | 1                      | 1                                               | 2                                 |                                       |                                       |
| <sup>4</sup> B <sub>2</sub> | 4388                              | 71 | 1                              | 2                     | 1                      | 2                                               | 1                                 | 3.09                                  | 2.70                                  |
|                             |                                   | 18 | 2                              | 1                     | 2                      | 1                                               | 1                                 |                                       |                                       |
| <sup>4</sup> B <sub>1</sub> | 5423                              | 40 | 2                              | 1                     | 2                      | 1                                               | 1                                 | 12.57                                 | 11.55                                 |
|                             |                                   | 27 | 1                              | 2                     | 2                      | 1                                               | 1                                 |                                       |                                       |
|                             |                                   | 15 | 1                              | 2                     | 1                      | 1                                               | 2                                 |                                       |                                       |
|                             |                                   | 14 | 2                              | 1                     | 1                      | 1                                               | 2                                 |                                       |                                       |
| <sup>4</sup> B <sub>2</sub> | 5858                              | 43 | 1                              | 2                     | 2                      | 1                                               | 1                                 | 11.04                                 | -10.45                                |
|                             |                                   | 18 | 2                              | 1                     | 2                      | 1                                               | 1                                 |                                       |                                       |
|                             |                                   | 17 | 1                              | 2                     | 1                      | 1                                               | 2                                 |                                       |                                       |
|                             |                                   | 10 | 1                              | 2                     | 1                      | 2                                               | 1                                 |                                       |                                       |
| <sup>2</sup> A <sub>1</sub> | 21147                             | 53 | 2                              | 2                     | 2                      | 0                                               | 1                                 | 7.44                                  | 0.00                                  |
|                             |                                   | 15 | 2                              | 2                     | 0                      | 2                                               | 1                                 |                                       |                                       |

**Table S33.** Computed NEVPT2 transition energies and state-wise contribution to the axial and rhombic ZFS parameters of  $[\text{Co}(\text{L}_5\text{H}_2)\text{I}(\text{H}_2\text{O})]$  (**10**).

| NEVPT2 excited states | Multiplicity | NEVPT2 energy (cm <sup>-1</sup> ) | Contribution to D (cm <sup>-1</sup> ) | Contribution to E (cm <sup>-1</sup> ) |
|-----------------------|--------------|-----------------------------------|---------------------------------------|---------------------------------------|
| 0                     | 4            | 0                                 | 0                                     | 0                                     |
| 1                     | 4            | 4222.5                            | 3.772                                 | -2.785                                |
| 2                     | 4            | 4387.9                            | 3.092                                 | 2.698                                 |
| 3                     | 4            | 5422.9                            | 12.568                                | 11.551                                |
| 4                     | 4            | 5858.3                            | 11.041                                | -10.446                               |
| 5                     | 4            | 12206.4                           | 0.006                                 | -0.005                                |
| 6                     | 4            | 13428.4                           | 0.001                                 | 0.001                                 |
| 7                     | 2            | 15814.7                           | 0.02                                  | -0.008                                |
| 8                     | 2            | 16867.2                           | 0.017                                 | 0.005                                 |
| 9                     | 2            | 17723.2                           | 1.667                                 | 0.002                                 |
| 10                    | 2            | 18234.3                           | -0.004                                | -0.004                                |
| 11                    | 4            | 20695.2                           | 0.025                                 | -0.022                                |
| 12                    | 2            | 21146.9                           | 7.439                                 | 0.003                                 |
| 13                    | 4            | 21101.9                           | 0.022                                 | 0.017                                 |
| 14                    | 2            | 21730.8                           | 0.079                                 | -0.019                                |
| 15                    | 2            | 21861.6                           | 0.025                                 | 0.002                                 |

|    |   |         |        |        |
|----|---|---------|--------|--------|
| 16 | 2 | 22119.1 | -1.516 | -1.376 |
| 17 | 2 | 22317.5 | -1.373 | 1.312  |
| 18 | 2 | 22335.4 | -0.001 | -0.001 |
| 19 | 4 | 24104.9 | 0.00   | 0.00   |
| 20 | 2 | 24984.1 | -0.009 | 0.012  |
| 21 | 2 | 25382.7 | -0.009 | -0.006 |
| 22 | 2 | 27138.5 | -0.015 | 0.016  |
| 23 | 2 | 27240.4 | -0.036 | -0.036 |
| 24 | 2 | 28580.6 | -0.079 | 0.077  |
| 25 | 2 | 28733.2 | -0.05  | -0.046 |
| 26 | 2 | 29077.1 | -0.286 | 0.27   |
| 27 | 2 | 29120.7 | -0.068 | 0.053  |
| 28 | 2 | 30066.8 | -0.307 | -0.302 |
| 29 | 2 | 31345.5 | 0      | -0.006 |
| 30 | 2 | 31750.2 | 0.079  | 0      |
| 31 | 2 | 31839.1 | 0.057  | -0.003 |
| 32 | 2 | 31840.6 | 1.321  | 0.001  |
| 33 | 2 | 33344.3 | -0.002 | 0      |
| 34 | 2 | 33514.3 | -0.029 | -0.017 |
| 35 | 2 | 33575.1 | -0.049 | 0.038  |
| 36 | 2 | 34454.5 | -0.447 | 0.135  |
| 37 | 2 | 34723.3 | -0.433 | -0.108 |
| 38 | 2 | 42305.4 | 0.001  | 0.001  |
| 39 | 2 | 42348.3 | 0.002  | 0      |
| 40 | 2 | 43465   | -0.008 | 0.001  |
| 41 | 2 | 43660.5 | -0.112 | -0.085 |
| 42 | 2 | 43857.5 | -0.128 | 0.08   |
| 43 | 2 | 43981.4 | -0.019 | -0.002 |
| 44 | 2 | 44438   | 0      | 0      |
| 45 | 2 | 63256.9 | 0.001  | 0      |
| 46 | 2 | 63362.4 | 0      | 0      |
| 47 | 2 | 64217.7 | -0.002 | -0.002 |
| 48 | 2 | 64528.1 | 0.001  | 0.002  |
| 49 | 2 | 65902.7 | 0.206  | 0      |

**Table S34.** Comparison of the calculated parameter for the magnetic anisotropy of  $[\text{Co}(\text{L}_5\text{H}_2)(\text{H}_2\text{O})(\text{NO}_3)]$  (**11**) at different levels of theory

| Calculated parameters  | CASSCF | NEVPT2 | Experimental values |
|------------------------|--------|--------|---------------------|
| D ( $\text{cm}^{-1}$ ) | 41.58  | 35.50  | 31.00               |
| E/D                    | 0.08   | 0.07   | 0.00                |
| $g_z$                  | 2.02   | 2.01   | -                   |
| $g_y$                  | 2.39   | 2.30   | -                   |
| $g_x$                  | 2.46   | 2.36   | -                   |
| $g_{\text{iso}}$       | 2.29   | 2.23   | 2.22                |

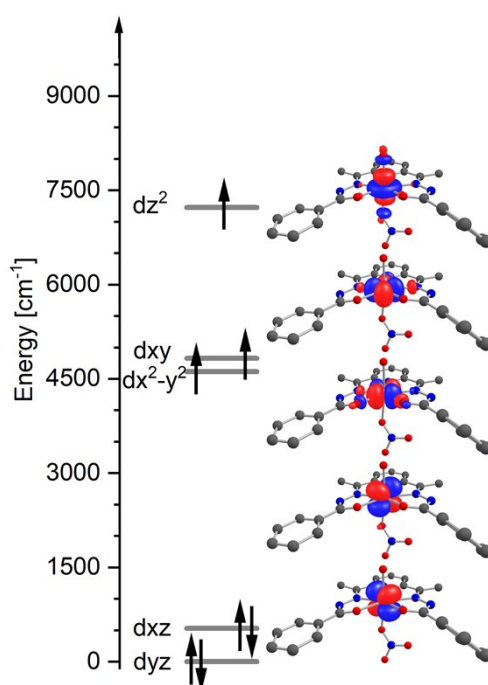

**Figure S12.** AILFT orbital energy diagram for  $[\text{Co}(\text{L}_5\text{H}_2)(\text{H}_2\text{O})(\text{NO}_3)]$  (**11**).

**Table S35.** Details of the major contributing excitations that lead to the D- and E-values (NEVPT2 level of theory) calculated for [Co(L<sub>5</sub>H<sub>2</sub>)(H<sub>2</sub>O)(NO<sub>3</sub>)] (**11**).

| NEVPT2 excited states          | NEVPT2 energy (cm <sup>-1</sup> ) | %  | Major electronic configuration |                       |                        |                                                 |                                   | Contribution to D (cm <sup>-1</sup> ) | Contribution to E (cm <sup>-1</sup> ) |
|--------------------------------|-----------------------------------|----|--------------------------------|-----------------------|------------------------|-------------------------------------------------|-----------------------------------|---------------------------------------|---------------------------------------|
|                                |                                   |    | d <sub>xz</sub> (0)            | d <sub>yz</sub> (531) | d <sub>xy</sub> (4614) | d <sub>x<sup>2</sup>-y<sup>2</sup></sub> (4828) | d <sub>z<sup>2</sup></sub> (7225) |                                       |                                       |
| <sup>4</sup> A <sub>2</sub> '  | 0                                 | 87 | 2                              | 2                     | 1                      | 1                                               | 1                                 | 0.00                                  | 0.00                                  |
| <sup>4</sup> E <sub>2</sub> '' | 4039                              | 39 | 2                              | 1                     | 1                      | 2                                               | 1                                 | 4.34                                  | 5.07                                  |
|                                |                                   | 31 | 2                              | 1                     | 2                      | 1                                               | 1                                 |                                       |                                       |
|                                |                                   | 20 | 1                              | 2                     | 2                      | 1                                               | 1                                 |                                       |                                       |
|                                | 4342                              | 41 | 1                              | 2                     | 1                      | 2                                               | 1                                 | 0.03                                  | -0.71                                 |
|                                |                                   | 37 | 2                              | 1                     | 2                      | 1                                               | 1                                 |                                       |                                       |
|                                |                                   | 17 | 2                              | 1                     | 1                      | 2                                               | 1                                 |                                       |                                       |
| <sup>4</sup> E <sub>1</sub> '' | 5361                              | 37 | 1                              | 2                     | 1                      | 2                                               | 1                                 | 11.87                                 | 11.95                                 |
|                                |                                   | 26 | 2                              | 1                     | 1                      | 1                                               | 2                                 |                                       |                                       |
|                                |                                   | 16 | 1                              | 2                     | 2                      | 1                                               | 1                                 |                                       |                                       |
|                                |                                   | 14 | 2                              | 1                     | 2                      | 1                                               | 1                                 |                                       |                                       |
|                                | 5812                              | 43 | 1                              | 2                     | 2                      | 1                                               | 1                                 | 13.52                                 | -13.53                                |
|                                |                                   | 30 | 1                              | 2                     | 1                      | 1                                               | 2                                 |                                       |                                       |
|                                |                                   | 20 | 2                              | 1                     | 1                      | 2                                               | 1                                 |                                       |                                       |
| <sup>2</sup> A <sub>1</sub> '  | 20577                             | 35 | 2                              | 2                     | 2                      | 0                                               | 1                                 | 12.58                                 | 0.00                                  |
|                                |                                   | 33 | 2                              | 2                     | 0                      | 2                                               | 1                                 |                                       |                                       |
|                                |                                   | 11 | 2                              | 0                     | 2                      | 2                                               | 1                                 |                                       |                                       |

**Table S36.** Computed NEVPT2 transition energies and state-wise contribution to the axial and rhombic ZFS parameters of [Co(L<sub>5</sub>H<sub>2</sub>)(H<sub>2</sub>O)(NO<sub>3</sub>)] (**11**).

| NEVPT2 excited states | Multiplicity | NEVPT2 energy (cm <sup>-1</sup> ) | Contribution to D (cm <sup>-1</sup> ) | Contribution to E (cm <sup>-1</sup> ) |
|-----------------------|--------------|-----------------------------------|---------------------------------------|---------------------------------------|
| 0                     | 4            | 0                                 | 0.00                                  | 0.00                                  |
| 1                     | 4            | 4039                              | 4.34                                  | 5.07                                  |
| 2                     | 4            | 4342                              | 0.03                                  | -0.71                                 |
| 3                     | 4            | 5361                              | 11.87                                 | 11.95                                 |
| 4                     | 4            | 5812                              | 13.52                                 | -13.53                                |
| 5                     | 4            | 12573                             | 0.04                                  | -0.01                                 |
| 6                     | 4            | 12963                             | 0.01                                  | 0.00                                  |
| 7                     | 2            | 16376                             | -0.02                                 | 0.00                                  |
| 8                     | 2            | 16655                             | 0.01                                  | 0.00                                  |
| 9                     | 2            | 18393                             | 0.16                                  | 0.00                                  |
| 10                    | 2            | 18437                             | -0.02                                 | -0.01                                 |
| 11                    | 2            | 20577                             | 12.58                                 | 0.00                                  |
| 12                    | 4            | 21098                             | 0.06                                  | -0.02                                 |
| 13                    | 4            | 21521                             | 0.06                                  | 0.01                                  |

|    |   |       |       |       |
|----|---|-------|-------|-------|
| 14 | 2 | 21729 | -0.12 | -0.11 |
| 15 | 2 | 21902 | 0.21  | 0.02  |
| 16 | 2 | 22195 | -1.45 | -1.17 |
| 17 | 2 | 22332 | -1.47 | 1.15  |
| 18 | 2 | 22798 | 0.00  | 0.00  |
| 19 | 4 | 23649 | 0.00  | 0.00  |
| 20 | 2 | 24844 | 0.01  | 0.00  |
| 21 | 2 | 25625 | 0.00  | 0.00  |
| 22 | 2 | 27105 | -0.01 | -0.01 |
| 23 | 2 | 27226 | 0.00  | 0.00  |
| 24 | 2 | 28588 | -0.39 | 0.38  |
| 25 | 2 | 29221 | -0.33 | -0.30 |
| 26 | 2 | 29359 | -0.04 | 0.01  |
| 27 | 2 | 29617 | 0.00  | 0.00  |
| 28 | 2 | 30770 | -0.02 | -0.04 |
| 29 | 2 | 31196 | -0.04 | 0.00  |
| 30 | 2 | 31585 | 1.37  | 0.00  |
| 31 | 2 | 31860 | 0.00  | 0.00  |
| 32 | 2 | 32083 | 0.01  | 0.00  |
| 33 | 2 | 33275 | -0.01 | -0.01 |
| 34 | 2 | 33496 | -0.18 | 0.11  |
| 35 | 2 | 33617 | -0.13 | -0.08 |
| 36 | 2 | 34615 | -0.38 | -0.23 |
| 37 | 2 | 35096 | -0.44 | 0.29  |
| 38 | 2 | 42740 | 0.00  | 0.00  |
| 39 | 2 | 42766 | 0.02  | -0.01 |
| 40 | 2 | 43681 | -0.16 | -0.10 |
| 41 | 2 | 43862 | -0.15 | 0.07  |
| 42 | 2 | 44049 | -0.01 | 0.00  |
| 43 | 2 | 44232 | -0.02 | 0.02  |
| 44 | 2 | 44563 | 0.00  | 0.00  |
| 45 | 2 | 63851 | 0.01  | 0.00  |
| 46 | 2 | 64041 | 0.00  | 0.00  |
| 47 | 2 | 64723 | 0.00  | 0.00  |
| 48 | 2 | 65130 | 0.01  | 0.00  |
| 49 | 2 | 66017 | 0.19  | 0.00  |

**Table S37.** Comparison of the calculated parameter for the magnetic anisotropy of  $[\text{Co}(\text{L}_5\text{H})(\text{H}_2\text{O})(\text{EtOH})]^+$  (**12**) at different levels of theory.

| Calculated parameters  | CASSCF | NEVPT2 | Experimental values |
|------------------------|--------|--------|---------------------|
| D ( $\text{cm}^{-1}$ ) | 44.07  | 37.51  | 27.65               |
| E/D                    | 0.01   | 0.00   | 0.00                |
| $g_z$                  | 1.99   | 2.00   | -                   |
| $g_y$                  | 2.42   | 2.33   | -                   |
| $g_x$                  | 2.43   | 2.34   | -                   |
| $g_{\text{iso}}$       | 2.28   | 2.22   | 2.25                |

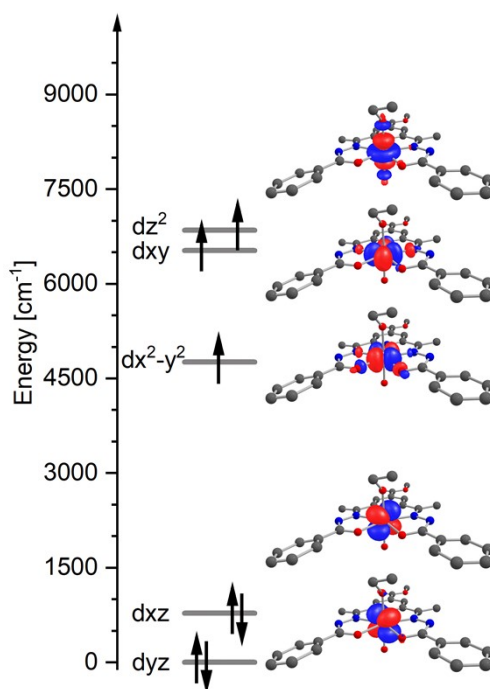

**Figure S13.** AILFT orbital energy diagram for  $[\text{Co}(\text{L}_5\text{H})(\text{H}_2\text{O})(\text{EtOH})]^+$  (**12**).

**Table S38.** Details of the major contributing excitations that lead to the D- and E-values (NEVPT2 level of theory) calculated for [Co(L<sub>5</sub>H)(H<sub>2</sub>O)(EtOH)]<sup>+</sup> (**12**).

| NEVPT2 excited states       | NEVPT2 energy (cm <sup>-1</sup> ) | %  | Major electronic configuration |                       |                        |                                                 |                                   | Contribution to D (cm <sup>-1</sup> ) | Contribution to E (cm <sup>-1</sup> ) |
|-----------------------------|-----------------------------------|----|--------------------------------|-----------------------|------------------------|-------------------------------------------------|-----------------------------------|---------------------------------------|---------------------------------------|
|                             |                                   |    | d <sub>xz</sub> (0)            | d <sub>yz</sub> (781) | d <sub>xy</sub> (4761) | d <sub>x<sup>2</sup>-y<sup>2</sup></sub> (6526) | d <sub>z<sup>2</sup></sub> (6845) |                                       |                                       |
| <sup>4</sup> A <sub>2</sub> | 0                                 | 90 | 2                              | 2                     | 1                      | 1                                               | 1                                 | 0.00                                  | 0.00                                  |
| <sup>4</sup> B <sub>1</sub> | 4105                              | 55 | 1                              | 2                     | 2                      | 1                                               | 1                                 | 7.58                                  | -4.53                                 |
|                             |                                   | 18 | 1                              | 2                     | 1                      | 2                                               | 1                                 |                                       |                                       |
|                             |                                   | 12 | 2                              | 1                     | 1                      | 2                                               | 1                                 |                                       |                                       |
| <sup>4</sup> B <sub>2</sub> | 4785                              | 57 | 2                              | 1                     | 2                      | 1                                               | 1                                 | 5.76                                  | 3.88                                  |
|                             |                                   | 15 | 2                              | 1                     | 1                      | 2                                               | 1                                 |                                       |                                       |
|                             |                                   | 14 | 1                              | 2                     | 1                      | 2                                               | 1                                 |                                       |                                       |
| <sup>4</sup> B <sub>1</sub> | 5746                              | 44 | 1                              | 2                     | 1                      | 2                                               | 1                                 | 9.88                                  | 6.32                                  |
|                             |                                   | 22 | 1                              | 2                     | 2                      | 1                                               | 1                                 |                                       |                                       |
|                             |                                   | 17 | 1                              | 2                     | 1                      | 1                                               | 2                                 |                                       |                                       |
| <sup>4</sup> B <sub>2</sub> | 6751                              | 45 | 2                              | 1                     | 1                      | 2                                               | 1                                 | 8.05                                  | -5.24                                 |
|                             |                                   | 20 | 1                              | 2                     | 1                      | 2                                               | 1                                 |                                       |                                       |
|                             |                                   | 16 | 2                              | 1                     | 1                      | 1                                               | 2                                 |                                       |                                       |
| <sup>2</sup> A <sub>1</sub> | 16932                             | 57 | 2                              | 2                     | 1                      | 1                                               | 1                                 | 2.86                                  | 0.00                                  |
|                             |                                   | 25 | 2                              | 2                     | 2                      | 0                                               | 1                                 |                                       |                                       |
| <sup>2</sup> A <sub>1</sub> | 21675                             | 39 | 2                              | 2                     | 0                      | 2                                               | 1                                 | 10.16                                 | 0.02                                  |
|                             |                                   | 18 | 2                              | 2                     | 2                      | 0                                               | 1                                 |                                       |                                       |
|                             |                                   | 12 | 2                              | 2                     | 1                      | 1                                               | 1                                 |                                       |                                       |

**Table S39.** Computed NEVPT2 transition energies and state-wise contribution to the axial and rhombic ZFS parameters of [Co(L<sub>5</sub>H)(H<sub>2</sub>O)(EtOH)]<sup>+</sup> (**12**).

| NEVPT2 excited states | Multiplicity | NEVPT2 energy (cm <sup>-1</sup> ) | Contribution to D (cm <sup>-1</sup> ) | Contribution to E (cm <sup>-1</sup> ) |
|-----------------------|--------------|-----------------------------------|---------------------------------------|---------------------------------------|
| 0                     | 4            | 0                                 | 0.00                                  | 0.00                                  |
| 1                     | 4            | 4105                              | 7.58                                  | -4.53                                 |
| 2                     | 4            | 4785                              | 5.76                                  | 3.88                                  |
| 3                     | 4            | 5746                              | 9.88                                  | 6.32                                  |
| 4                     | 4            | 6751                              | 8.05                                  | -5.24                                 |
| 5                     | 4            | 11917                             | 0.01                                  | -0.01                                 |
| 6                     | 4            | 14119                             | 0.00                                  | 0.00                                  |
| 7                     | 2            | 16759                             | 0.34                                  | -0.01                                 |
| 8                     | 2            | 16932                             | 2.86                                  | 0.00                                  |
| 9                     | 2            | 18232                             | 0.00                                  | 0.00                                  |
| 10                    | 2            | 18468                             | 0.05                                  | 0.01                                  |
| 11                    | 4            | 20589                             | 0.04                                  | -0.01                                 |



|    |   |       |       |       |
|----|---|-------|-------|-------|
| 12 | 4 | 21549 | 0.05  | 0.01  |
| 13 | 2 | 21675 | 10.16 | 0.02  |
| 14 | 2 | 22031 | -0.01 | 0.01  |
| 15 | 2 | 22253 | 0.08  | -0.06 |
| 16 | 2 | 22394 | -1.35 | 0.33  |
| 17 | 2 | 22661 | 0.00  | 0.00  |
| 18 | 2 | 22835 | -1.46 | -0.36 |
| 19 | 4 | 25272 | 0.00  | 0.00  |
| 20 | 2 | 25491 | -0.12 | 0.01  |
| 21 | 2 | 25927 | -0.07 | -0.03 |
| 22 | 2 | 27748 | -0.03 | -0.03 |
| 23 | 2 | 28069 | -0.07 | 0.02  |
| 24 | 2 | 28170 | -0.12 | 0.10  |
| 25 | 2 | 28391 | -0.02 | -0.02 |
| 26 | 2 | 29567 | -0.30 | 0.07  |
| 27 | 2 | 29688 | -0.32 | 0.00  |
| 28 | 2 | 30437 | -0.01 | 0.00  |
| 29 | 2 | 31258 | 0.25  | -0.03 |
| 30 | 2 | 31970 | 0.04  | 0.00  |
| 31 | 2 | 32124 | 0.04  | -0.01 |
| 32 | 2 | 32594 | 1.01  | 0.00  |
| 33 | 2 | 33963 | -0.07 | -0.05 |
| 34 | 2 | 34012 | -0.01 | 0.00  |
| 35 | 2 | 34492 | -0.20 | 0.17  |
| 36 | 2 | 34566 | -0.26 | -0.05 |
| 37 | 2 | 35416 | -0.47 | -0.06 |
| 38 | 2 | 42705 | 0.00  | 0.00  |
| 39 | 2 | 42717 | 0.00  | 0.00  |
| 40 | 2 | 43718 | 0.00  | 0.00  |
| 41 | 2 | 44618 | -0.06 | -0.03 |
| 42 | 2 | 44842 | -0.07 | -0.02 |
| 43 | 2 | 44993 | -0.14 | 0.04  |
| 44 | 2 | 45561 | 0.00  | 0.00  |
| 45 | 2 | 63712 | 0.01  | 0.00  |
| 46 | 2 | 63863 | 0.00  | 0.00  |
| 47 | 2 | 65291 | 0.00  | 0.00  |
| 48 | 2 | 65775 | 0.00  | 0.00  |
| 49 | 2 | 67392 | 0.21  | 0.00  |

**Table S40.** Comparison of the calculated parameters for the magnetic anisotropy of  $[\text{Co}(\text{L}_5)(\text{H}_2\text{O})]$  (**13**) at different levels of theory.

| Calculated parameters  | CASSCF | NEVPT2 | Experimental values |
|------------------------|--------|--------|---------------------|
| D ( $\text{cm}^{-1}$ ) | 40.36  | 34.37  | 13.10               |
| E/D                    | 0.07   | 0.06   | 0.00                |
| $g_z$                  | 2.01   | 2.01   | -                   |
| $g_y$                  | 2.35   | 2.28   | -                   |
| $g_x$                  | 2.42   | 2.32   | -                   |
| $g_{\text{iso}}$       | 2.26   | 2.20   | 2.06                |

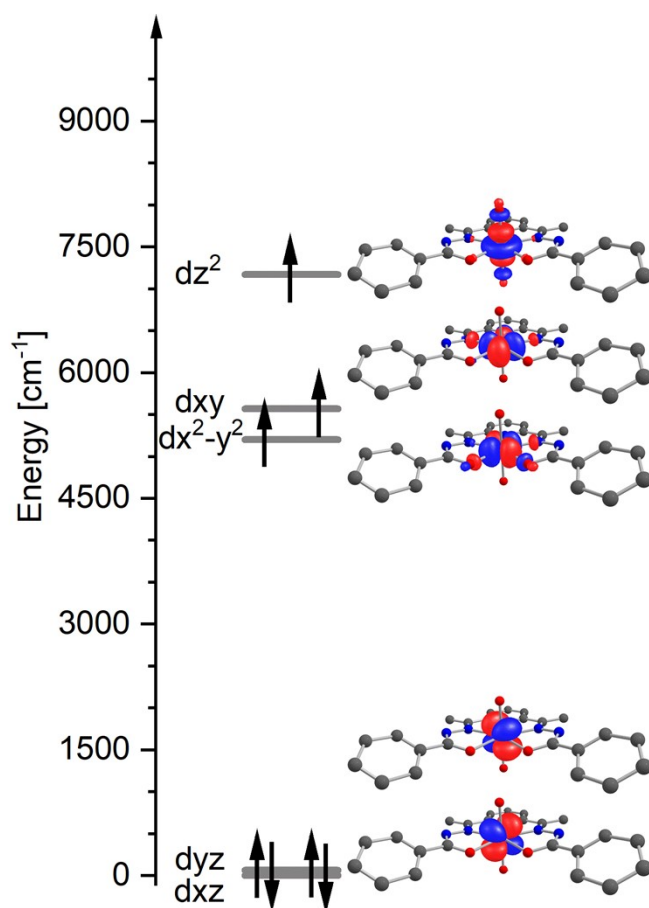

**Figure S14.** AILFT orbital energy diagram for  $[\text{Co}(\text{L}_5)(\text{H}_2\text{O})]$  (**13**).

**Table S41.** Details of the major contributing excitations that lead to the D- and E-values (NEVPT2 level of theory) calculated for [Co(L<sub>5</sub>)(H<sub>2</sub>O)] (**13**).

| NEVPT2 excited states          | NEVPT2 energy (cm <sup>-1</sup> ) | %  | Major electronic configuration |                      |                        |                                                 |                                   | Contribution to D (cm <sup>-1</sup> ) | Contribution to E (cm <sup>-1</sup> ) |
|--------------------------------|-----------------------------------|----|--------------------------------|----------------------|------------------------|-------------------------------------------------|-----------------------------------|---------------------------------------|---------------------------------------|
|                                |                                   |    | d <sub>xz</sub> (0)            | d <sub>yz</sub> (66) | d <sub>xy</sub> (5202) | d <sub>x<sup>2</sup>-y<sup>2</sup></sub> (5570) | d <sub>z<sup>2</sup></sub> (7169) |                                       |                                       |
| <sup>4</sup> A <sub>2</sub> '  | 0                                 | 90 | 2                              | 1                    | 1                      | 2                                               | 1                                 | 0.00                                  | 0.00                                  |
| <sup>4</sup> E <sub>2</sub> '' | 5157                              | 43 | 1                              | 2                    | 2                      | 1                                               | 1                                 | 1.68                                  | -2.22                                 |
|                                |                                   | 30 | 2                              | 1                    | 2                      | 1                                               | 1                                 |                                       |                                       |
|                                |                                   | 20 | 2                              | 1                    | 1                      | 2                                               | 1                                 |                                       |                                       |
|                                | 5477                              | 41 | 2                              | 1                    | 2                      | 1                                               | 1                                 | 0.47                                  | 0.47                                  |
|                                |                                   | 27 | 1                              | 2                    | 1                      | 2                                               | 1                                 |                                       |                                       |
| 21                             |                                   | 1  | 2                              | 2                    | 1                      | 1                                               |                                   |                                       |                                       |
| <sup>4</sup> E <sub>1</sub> '' | 5628                              | 22 | 2                              | 2                    | 1                      | 1                                               | 1                                 | 14.63                                 | 14.53                                 |
|                                |                                   | 22 | 2                              | 1                    | 2                      | 1                                               | 1                                 |                                       |                                       |
|                                |                                   | 20 | 1                              | 2                    | 1                      | 2                                               | 1                                 |                                       |                                       |
|                                |                                   | 18 | 1                              | 2                    | 1                      | 2                                               | 1                                 |                                       |                                       |
|                                |                                   | 13 | 1                              | 1                    | 2                      | 2                                               | 1                                 |                                       |                                       |
|                                | 6568                              | 32 | 1                              | 2                    | 1                      | 2                                               | 1                                 | 10.60                                 | -10.75                                |
|                                |                                   | 30 | 2                              | 2                    | 1                      | 1                                               | 1                                 |                                       |                                       |
|                                |                                   | 18 | 1                              | 1                    | 2                      | 2                                               | 1                                 |                                       |                                       |
| <sup>2</sup> A <sub>1</sub> '  | 20841                             | 49 | 2                              | 2                    | 1                      | 2                                               | 0                                 | 12.98                                 | 0.00                                  |
|                                |                                   | 24 | 2                              | 0                    | 1                      | 2                                               | 2                                 |                                       |                                       |

**Table S42.** Computed NEVPT2 transition energies and state-wise contribution to the axial and rhombic ZFS parameters of [Co(L<sub>5</sub>)(H<sub>2</sub>O)] (**13**).

| NEVPT2 excited states | Multiplicity | NEVPT2 energy (cm <sup>-1</sup> ) | Contribution to D (cm <sup>-1</sup> ) | Contribution to E (cm <sup>-1</sup> ) |
|-----------------------|--------------|-----------------------------------|---------------------------------------|---------------------------------------|
| 0                     | 4            | 0                                 | 0.00                                  | 0.00                                  |
| 1                     | 4            | 5157                              | 1.68                                  | -2.22                                 |
| 2                     | 4            | 5477                              | 0.47                                  | 0.47                                  |
| 3                     | 4            | 5628                              | 14.63                                 | 14.53                                 |
| 4                     | 4            | 6568                              | 10.60                                 | -10.75                                |
| 5                     | 4            | 13550                             | 0.01                                  | 0.01                                  |
| 6                     | 4            | 14148                             | 0.01                                  | -0.01                                 |
| 7                     | 2            | 16958                             | 0.33                                  | 0.04                                  |
| 8                     | 2            | 17534                             | -0.01                                 | -0.01                                 |
| 9                     | 2            | 18224                             | 0.28                                  | 0.00                                  |
| 10                    | 2            | 18299                             | -0.03                                 | -0.03                                 |
| 11                    | 2            | 20841                             | 12.98                                 | 0.00                                  |
| 12                    | 4            | 21206                             | 0.05                                  | -0.05                                 |
| 13                    | 4            | 21905                             | 0.05                                  | 0.05                                  |

|    |   |       |       |       |
|----|---|-------|-------|-------|
| 14 | 2 | 22580 | 0.04  | 0.00  |
| 15 | 2 | 22596 | 0.07  | 0.00  |
| 16 | 2 | 22902 | 0.00  | 0.00  |
| 17 | 2 | 23012 | -1.58 | -1.58 |
| 18 | 2 | 23273 | -1.45 | 1.46  |
| 19 | 4 | 25630 | 0.00  | 0.00  |
| 20 | 2 | 26195 | 0.00  | 0.00  |
| 21 | 2 | 26762 | -0.05 | -0.05 |
| 22 | 2 | 27555 | -0.01 | -0.01 |
| 23 | 2 | 27850 | -0.01 | 0.02  |
| 24 | 2 | 28827 | -0.49 | 0.49  |
| 25 | 2 | 29351 | -0.03 | -0.03 |
| 26 | 2 | 29429 | -0.02 | 0.02  |
| 27 | 2 | 29476 | -0.37 | -0.36 |
| 28 | 2 | 31654 | -0.01 | -0.01 |
| 29 | 2 | 32012 | 0.01  | 0.01  |
| 30 | 2 | 32794 | 1.12  | 0.00  |
| 31 | 2 | 33015 | 0.04  | 0.00  |
| 32 | 2 | 33028 | 0.00  | 0.00  |
| 33 | 2 | 34481 | -0.16 | 0.16  |
| 34 | 2 | 34584 | -0.10 | -0.10 |
| 35 | 2 | 34922 | 0.00  | 0.00  |
| 36 | 2 | 35750 | -0.41 | 0.39  |
| 37 | 2 | 35941 | -0.39 | -0.36 |
| 38 | 2 | 43040 | 0.00  | 0.00  |
| 39 | 2 | 43082 | 0.01  | 0.00  |
| 40 | 2 | 44466 | -0.03 | -0.03 |
| 41 | 2 | 44704 | -0.03 | 0.03  |
| 42 | 2 | 45236 | -0.12 | -0.12 |
| 43 | 2 | 45425 | -0.10 | 0.10  |
| 44 | 2 | 45983 | 0.00  | 0.00  |
| 45 | 2 | 64275 | 0.00  | 0.00  |
| 46 | 2 | 64391 | 0.00  | 0.00  |
| 47 | 2 | 65644 | 0.00  | 0.00  |
| 48 | 2 | 66227 | 0.00  | 0.00  |
| 49 | 2 | 67656 | 0.20  | 0.00  |

**Table S43.** Comparison of the calculated parameters for the magnetic anisotropy of  $[\text{Co}(\text{L}_5)(\text{im})_2]$  (**14**) at different levels of theory.

| Calculated parameters  | CASSCF | NEVPT2 | Experimental values |
|------------------------|--------|--------|---------------------|
| D ( $\text{cm}^{-1}$ ) | 41.32  | 35.00  | 24.80               |
| E/D                    | 0.08   | 0.06   | 0.00                |
| $g_z$                  | 1.99   | 2.00   | -                   |
| $g_y$                  | 2.35   | 2.27   | -                   |
| $g_x$                  | 2.42   | 2.32   | -                   |
| $g_{\text{iso}}$       | 2.26   | 2.20   | 2.21                |

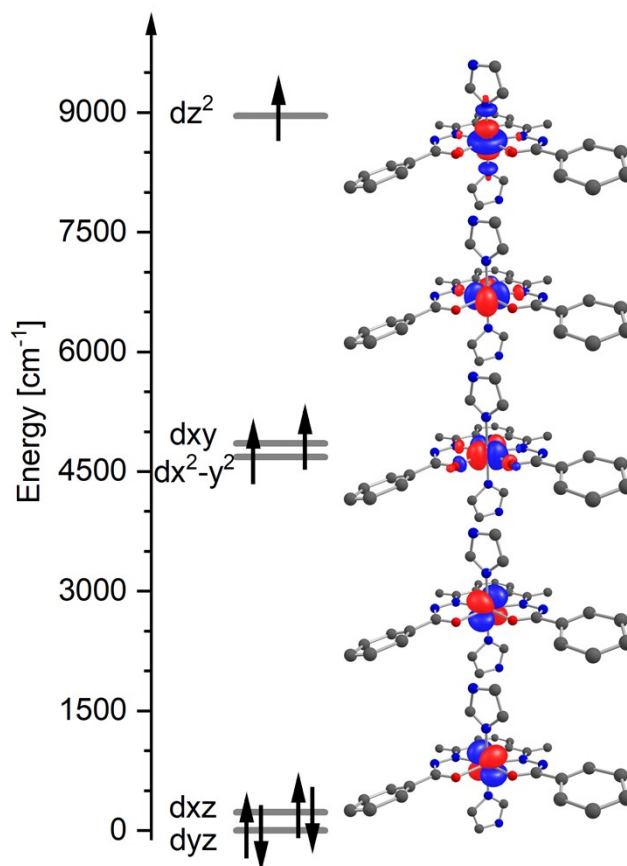

**Figure S15.** AILFT orbital energy diagram for  $[\text{Co}(\text{L}_5)(\text{im})_2]$  (**14**).

**Table S44.** Details of the major contributing excitations that lead to the D- and E-values (NEVPT2 level of theory) calculated for [Co(L<sub>5</sub>)(im)<sub>2</sub>] (**14**).

| NEVPT2 excited states          | NEVPT2 energy (cm <sup>-1</sup> ) | %  | Major electronic configuration |                       |                        |                                                 |                                   | Contribution to D (cm <sup>-1</sup> ) | Contribution to E (cm <sup>-1</sup> ) |  |
|--------------------------------|-----------------------------------|----|--------------------------------|-----------------------|------------------------|-------------------------------------------------|-----------------------------------|---------------------------------------|---------------------------------------|--|
|                                |                                   |    | d <sub>xz</sub> (0)            | d <sub>yz</sub> (232) | d <sub>xy</sub> (4683) | d <sub>x<sup>2</sup>-y<sup>2</sup></sub> (4854) | d <sub>z<sup>2</sup></sub> (8958) |                                       |                                       |  |
| <sup>4</sup> A <sub>2</sub> '  | 0                                 | 89 | 2                              | 2                     | 1                      | 1                                               | 1                                 | 0.00                                  | 0.00                                  |  |
| <sup>4</sup> E <sub>2</sub> '' | 4454                              | 44 | 2                              | 1                     | 2                      | 1                                               | 1                                 | 0.74                                  | -0.74                                 |  |
|                                |                                   | 25 | 1                              | 2                     | 1                      | 2                                               | 1                                 |                                       |                                       |  |
|                                |                                   | 21 | 1                              | 2                     | 2                      | 1                                               | 1                                 |                                       |                                       |  |
|                                | 4476                              | 43 | 2                              | 1                     | 1                      | 2                                               | 1                                 | 0.31                                  | 0.53                                  |  |
|                                |                                   | 28 | 1                              | 2                     | 2                      | 1                                               | 1                                 |                                       |                                       |  |
| 19                             |                                   | 1  | 2                              | 1                     | 2                      | 1                                               |                                   |                                       |                                       |  |
| <sup>4</sup> E <sub>1</sub> '' | 5781                              | 25 | 2                              | 1                     | 2                      | 1                                               | 1                                 | 14.43                                 | 14.43                                 |  |
|                                |                                   | 22 | 1                              | 2                     | 2                      | 1                                               | 1                                 |                                       |                                       |  |
|                                |                                   | 17 | 2                              | 1                     | 1                      | 1                                               | 2                                 |                                       |                                       |  |
|                                |                                   | 14 | 1                              | 2                     | 1                      | 2                                               | 1                                 |                                       |                                       |  |
|                                | 6618                              | 13 | 1                              | 2                     | 1                      | 1                                               | 2                                 | 12.03                                 | -12.03                                |  |
|                                |                                   | 27 | 2                              | 1                     | 1                      | 2                                               | 1                                 |                                       |                                       |  |
|                                |                                   | 25 | 1                              | 2                     | 1                      | 2                                               | 1                                 |                                       |                                       |  |
|                                |                                   | 16 | 1                              | 2                     | 1                      | 1                                               | 2                                 |                                       |                                       |  |
| <sup>2</sup> A <sub>1</sub> '  | 20494                             | 13 | 1                              | 2                     | 2                      | 1                                               | 1                                 | 13.65                                 | 0.00                                  |  |
|                                |                                   | 12 | 2                              | 1                     | 1                      | 1                                               | 2                                 |                                       |                                       |  |
|                                |                                   | 42 | 2                              | 2                     | 0                      | 2                                               | 1                                 |                                       |                                       |  |
|                                |                                   | 29 | 2                              | 2                     | 2                      | 0                                               | 1                                 |                                       |                                       |  |
|                                |                                   |    | 10                             | 2                     | 0                      | 2                                               | 2                                 | 1                                     |                                       |  |
|                                |                                   |    | 10                             | 0                     | 2                      | 2                                               | 2                                 | 1                                     |                                       |  |

**Table S45.** Computed NEVPT2 transition energies and state-wise contribution to the axial and rhombic ZFS parameters of [Co(L<sub>5</sub>)(im)<sub>2</sub>] (**14**).

| NEVPT2 excited states | Multiplicity | NEVPT2 energy (cm <sup>-1</sup> ) | Contribution to D (cm <sup>-1</sup> ) | Contribution to E (cm <sup>-1</sup> ) |
|-----------------------|--------------|-----------------------------------|---------------------------------------|---------------------------------------|
| 0                     | 4            | 0                                 | 0.00                                  | 0.00                                  |
| 1                     | 4            | 4454                              | 0.74                                  | -0.74                                 |
| 2                     | 4            | 4476                              | 0.31                                  | 0.53                                  |
| 3                     | 4            | 5781                              | 14.43                                 | 14.43                                 |
| 4                     | 4            | 6618                              | 12.03                                 | -12.03                                |
| 5                     | 2            | 14576                             | 0.10                                  | -0.01                                 |
| 6                     | 2            | 14781                             | -0.01                                 | 0.01                                  |
| 7                     | 4            | 14925                             | 0.00                                  | 0.00                                  |
| 8                     | 4            | 15142                             | 0.00                                  | 0.00                                  |
| 9                     | 2            | 18332                             | 0.09                                  | 0.00                                  |
| 10                    | 2            | 18343                             | 0.00                                  | 0.00                                  |

|    |   |       |       |       |
|----|---|-------|-------|-------|
| 11 | 2 | 20494 | 13.65 | 0.00  |
| 12 | 2 | 22117 | -0.22 | 0.22  |
| 13 | 2 | 22179 | -0.44 | -0.45 |
| 14 | 4 | 22284 | 0.12  | -0.12 |
| 15 | 2 | 22329 | -1.16 | -1.17 |
| 16 | 2 | 22497 | -1.28 | 1.28  |
| 17 | 2 | 22610 | 0.00  | 0.00  |
| 18 | 4 | 22825 | 0.10  | 0.10  |
| 19 | 4 | 23960 | 0.00  | 0.00  |
| 20 | 2 | 24361 | 0.00  | 0.00  |
| 21 | 2 | 25081 | 0.00  | 0.00  |
| 22 | 2 | 27743 | 0.00  | 0.00  |
| 23 | 2 | 27796 | 0.00  | 0.00  |
| 24 | 2 | 29779 | -0.28 | 0.28  |
| 25 | 2 | 30505 | -0.19 | -0.19 |
| 26 | 2 | 30913 | -0.10 | -0.10 |
| 27 | 2 | 31180 | -0.07 | 0.07  |
| 28 | 2 | 32576 | 0.00  | 0.00  |
| 29 | 2 | 32612 | 0.03  | -0.01 |
| 30 | 2 | 33357 | 1.16  | 0.00  |
| 31 | 2 | 34148 | 0.01  | 0.00  |
| 32 | 2 | 34166 | 0.00  | 0.00  |
| 33 | 2 | 34636 | 0.00  | 0.00  |
| 34 | 2 | 35063 | -0.02 | 0.02  |
| 35 | 2 | 35133 | 0.01  | -0.02 |
| 36 | 2 | 36679 | -0.52 | -0.52 |
| 37 | 2 | 36705 | -0.62 | 0.62  |
| 38 | 2 | 43500 | -0.05 | -0.05 |
| 39 | 2 | 43620 | -0.03 | 0.03  |
| 40 | 2 | 44190 | -0.15 | -0.15 |
| 41 | 2 | 44394 | -0.16 | 0.16  |
| 42 | 2 | 44867 | 0.00  | 0.00  |
| 43 | 2 | 44901 | 0.00  | 0.00  |
| 44 | 2 | 45206 | 0.00  | 0.00  |
| 45 | 2 | 65103 | 0.03  | 0.00  |
| 46 | 2 | 65186 | 0.00  | 0.00  |
| 47 | 2 | 65202 | 0.01  | 0.00  |
| 48 | 2 | 65795 | 0.00  | 0.00  |
| 49 | 2 | 66212 | 0.18  | 0.00  |

**Table S46.** Comparison of the calculated parameters for the magnetic anisotropy of  $[\text{Co}(\text{L}_5\text{H}_2)(\text{NCS})_2]$  (**15**) at different levels of theory.

| Calculated parameters    | CASSCF | NEVPT2 | Experimental values |
|--------------------------|--------|--------|---------------------|
| $D$ ( $\text{cm}^{-1}$ ) | 44.17  | 38.07  | 15.90               |
| $E/D$                    | 0.06   | 0.05   | 0.00                |
| $g_z$                    | 2.01   | 2.01   | -                   |
| $g_y$                    | 2.43   | 2.34   | -                   |
| $g_x$                    | 2.48   | 2.38   | -                   |
| $g_{\text{iso}}$         | 2.31   | 2.24   | 2.14                |

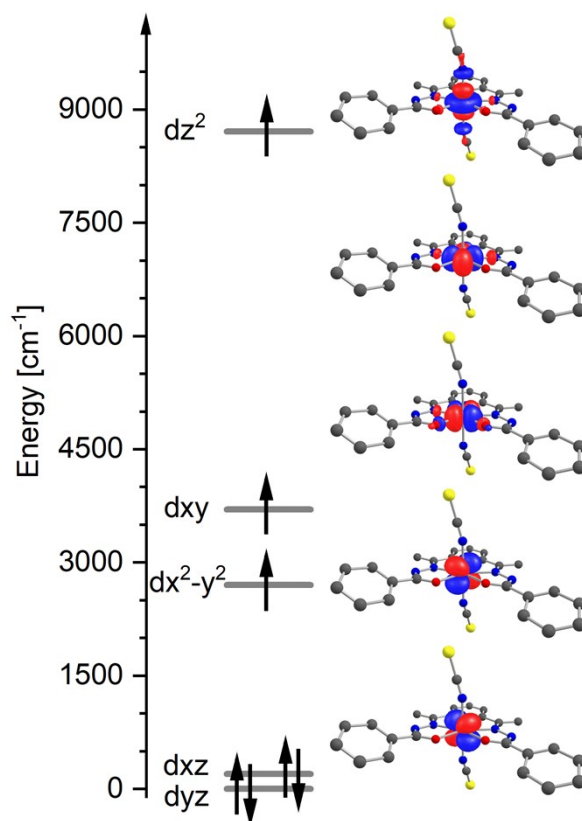

**Figure S16.** AILFT orbital energy diagram for  $[\text{Co}(\text{L}_5\text{H}_2)(\text{NCS})_2]$  (**15**).



**Table S47.** Details of the major contributing excitations that lead to the D- and E-values (NEVPT2 level of theory) calculated for  $[\text{Co}(\text{L}_5\text{H}_2)(\text{NCS})_2]$  (**15**).

| NEVPT2 excited states | NEVPT2 energy ( $\text{cm}^{-1}$ ) | %  | Major electronic configuration |                |                 |                      |                  | Contribution to D ( $\text{cm}^{-1}$ ) | Contribution to E ( $\text{cm}^{-1}$ ) |
|-----------------------|------------------------------------|----|--------------------------------|----------------|-----------------|----------------------|------------------|----------------------------------------|----------------------------------------|
|                       |                                    |    | $d_{xz}$ (0)                   | $d_{yz}$ (200) | $d_{xy}$ (2704) | $d_{x^2-y^2}$ (3703) | $d_{z^2}$ (8707) |                                        |                                        |
| $^4\text{A}_2'$       | 0                                  | 86 | 2                              | 2              | 1               | 1                    | 1                | 0.00                                   | 0.00                                   |
|                       |                                    | 12 | 1                              | 1              | 2               | 2                    | 1                |                                        |                                        |
| $^4\text{E}_2''$      | 2676                               | 47 | 2                              | 1              | 2               | 1                    | 1                | 1.34                                   | -0.43                                  |
|                       |                                    | 30 | 1                              | 2              | 1               | 2                    | 1                |                                        |                                        |
|                       |                                    | 19 | 1                              | 2              | 2               | 1                    | 1                |                                        |                                        |
|                       | 2849                               | 47 | 1                              | 2              | 2               | 1                    | 1                | 0.07                                   | 0.44                                   |
|                       |                                    | 32 | 2                              | 1              | 1               | 2                    | 1                |                                        |                                        |
|                       |                                    | 14 | 2                              | 1              | 2               | 1                    | 1                |                                        |                                        |
| $^4\text{E}_1''$      | 4789                               | 33 | 2                              | 1              | 1               | 2                    | 1                | 17.03                                  | 15.21                                  |
|                       |                                    | 17 | 2                              | 1              | 2               | 1                    | 1                |                                        |                                        |
|                       |                                    | 16 | 1                              | 2              | 1               | 1                    | 2                |                                        |                                        |
|                       |                                    | 12 | 1                              | 2              | 1               | 2                    | 1                |                                        |                                        |
|                       |                                    | 11 | 2                              | 1              | 1               | 1                    | 2                |                                        |                                        |
|                       |                                    | 10 | 1                              | 2              | 2               | 1                    | 1                |                                        |                                        |
|                       | 5314                               | 38 | 1                              | 2              | 1               | 2                    | 1                | 14.49                                  | -13.32                                 |
|                       |                                    | 18 | 2                              | 1              | 1               | 2                    | 1                |                                        |                                        |
|                       |                                    | 15 | 2                              | 1              | 1               | 1                    | 2                |                                        |                                        |
|                       |                                    | 10 | 1                              | 2              | 1               | 1                    | 2                |                                        |                                        |
| $^2\text{A}_1'$       | 20574                              | 54 | 2                              | 2              | 0               | 2                    | 1                | 9.64                                   | 0.08                                   |

**Table S48.** Computed NEVPT2 transition energies and state-wise contribution to the axial and rhombic ZFS parameters of  $[\text{Co}(\text{L}_5\text{H}_2)(\text{NCS})_2]$  (**15**).

| NEVPT2 excited states | Multiplicity | NEVPT2 energy ( $\text{cm}^{-1}$ ) | Contribution to D ( $\text{cm}^{-1}$ ) | Contribution to E ( $\text{cm}^{-1}$ ) |
|-----------------------|--------------|------------------------------------|----------------------------------------|----------------------------------------|
| 0                     | 4            | 0                                  | 0.00                                   | 0.00                                   |
| 1                     | 4            | 2676                               | 1.34                                   | -0.43                                  |
| 2                     | 4            | 2849                               | 0.07                                   | 0.44                                   |
| 3                     | 4            | 4789                               | 17.03                                  | 15.21                                  |
| 4                     | 4            | 5314                               | 14.49                                  | -13.32                                 |
| 5                     | 4            | 12574                              | 0.03                                   | -0.02                                  |
| 6                     | 2            | 12927                              | -0.03                                  | -0.01                                  |
| 7                     | 4            | 13752                              | 0.01                                   | 0.01                                   |
| 8                     | 2            | 14007                              | -0.01                                  | 0.01                                   |
| 9                     | 2            | 17990                              | 2.63                                   | 0.01                                   |
| 10                    | 2            | 18579                              | 0.00                                   | 0.00                                   |
| 11                    | 2            | 20376                              | -0.99                                  | -0.15                                  |
| 12                    | 2            | 20574                              | 9.64                                   | 0.08                                   |

|    |   |       |       |       |
|----|---|-------|-------|-------|
| 13 | 2 | 20595 | -1.29 | -0.12 |
| 14 | 4 | 20645 | 0.00  | 0.00  |
| 15 | 2 | 20952 | -0.21 | -0.17 |
| 16 | 2 | 20971 | -0.15 | 0.30  |
| 17 | 4 | 22044 | 0.14  | -0.13 |
| 18 | 4 | 22402 | 0.13  | 0.11  |
| 19 | 2 | 22429 | 0.00  | 0.00  |
| 20 | 2 | 22444 | 0.00  | 0.00  |
| 21 | 2 | 22847 | 0.00  | 0.00  |
| 22 | 2 | 26576 | -0.01 | 0.00  |
| 23 | 2 | 26600 | -0.01 | 0.01  |
| 24 | 2 | 28997 | -0.18 | 0.06  |
| 25 | 2 | 29275 | -0.16 | -0.07 |
| 26 | 2 | 30320 | -0.03 | 0.03  |
| 27 | 2 | 31127 | 0.03  | 0.00  |
| 28 | 2 | 31611 | -0.04 | -0.04 |
| 29 | 2 | 31637 | -0.01 | 0.03  |
| 30 | 2 | 31953 | 0.90  | 0.00  |
| 31 | 2 | 32061 | 0.51  | 0.00  |
| 32 | 2 | 32107 | -0.02 | -0.02 |
| 33 | 2 | 32196 | 0.11  | 0.02  |
| 34 | 2 | 32759 | -0.07 | 0.06  |
| 35 | 2 | 32913 | -0.03 | -0.04 |
| 36 | 2 | 34589 | -0.60 | -0.06 |
| 37 | 2 | 34738 | -0.61 | 0.12  |
| 38 | 2 | 42108 | -0.26 | -0.15 |
| 39 | 2 | 42277 | -0.26 | 0.13  |
| 40 | 2 | 43057 | 0.00  | 0.00  |
| 41 | 2 | 43253 | 0.00  | 0.00  |
| 42 | 2 | 43315 | -0.01 | 0.01  |
| 43 | 2 | 43840 | 0.00  | 0.00  |
| 44 | 2 | 44118 | 0.00  | 0.00  |
| 45 | 2 | 63242 | 0.21  | 0.00  |
| 46 | 2 | 63520 | 0.00  | 0.00  |
| 47 | 2 | 63826 | 0.00  | 0.00  |
| 48 | 2 | 64735 | 0.00  | 0.00  |
| 49 | 2 | 64839 | 0.00  | 0.00  |

**Table S49.** Comparison of the calculated parameters for the magnetic anisotropy of  $[\text{Co}(\text{NO}_3)(\text{EtOH})]^+$  (**16**) at different levels of theory.

| Calculated parameters  | CASSCF | NEVPT2 | Experimental values |
|------------------------|--------|--------|---------------------|
| D ( $\text{cm}^{-1}$ ) | 44.79  | 38.21  | 33.00               |
| E/D                    | 0.02   | 0.01   | 0.00                |
| $g_z$                  | 1.99   | 2.00   | -                   |
| $g_y$                  | 2.42   | 2.33   | -                   |
| $g_x$                  | 2.44   | 2.35   | -                   |
| $g_{\text{iso}}$       | 2.29   | 2.23   | 2.25                |

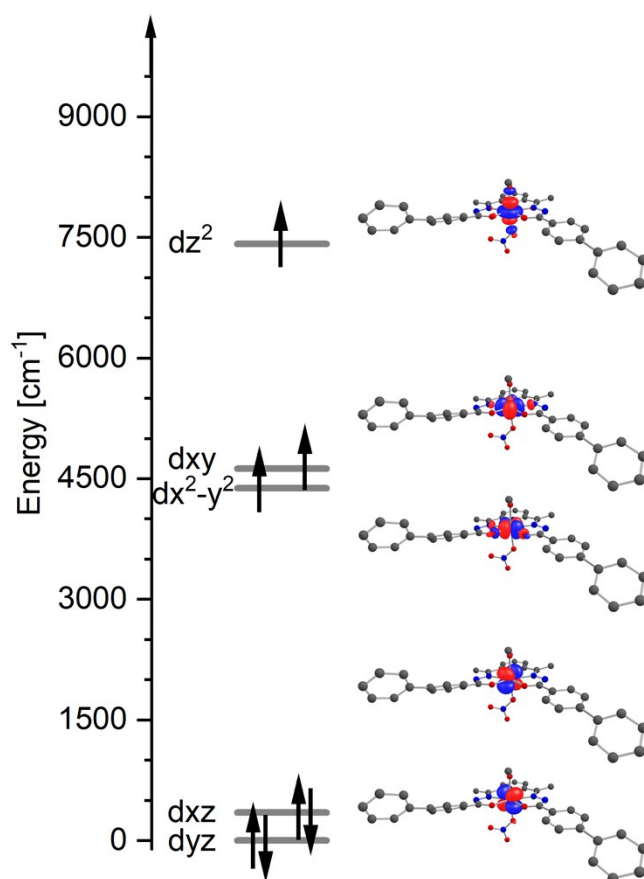

**Figure S17.** AILFT orbital energy diagram for  $[\text{Co}(\text{NO}_3)(\text{EtOH})]^+$  (**16**).

**Table S50.** Details of the major contributing excitations that lead to the D- and E-values (NEVPT2 level of theory) calculated for [Co(NO<sub>3</sub>)(EtOH)]<sup>+</sup> (**16**).

| NEVPT2 excited states          | NEVPT2 energy (cm <sup>-1</sup> ) | %  | Major electronic configuration |                       |                        |                                                 |                                   | Contribution to D (cm <sup>-1</sup> ) | Contribution to E (cm <sup>-1</sup> ) |
|--------------------------------|-----------------------------------|----|--------------------------------|-----------------------|------------------------|-------------------------------------------------|-----------------------------------|---------------------------------------|---------------------------------------|
|                                |                                   |    | d <sub>xz</sub> (0)            | d <sub>yz</sub> (348) | d <sub>xy</sub> (4383) | d <sub>x<sup>2</sup>-y<sup>2</sup></sub> (4626) | d <sub>z<sup>2</sup></sub> (7418) |                                       |                                       |
| <sup>4</sup> A <sub>2</sub> '  | 0                                 | 88 | 2                              | 2                     | 1                      | 1                                               | 1                                 | 0.00                                  | 0.00                                  |
| <sup>4</sup> E <sub>2</sub> '' | 4026                              | 50 | 2                              | 1                     | 1                      | 2                                               | 1                                 | 1.36                                  | -0.70                                 |
|                                |                                   | 16 | 1                              | 2                     | 1                      | 2                                               | 1                                 |                                       |                                       |
|                                |                                   | 16 | 1                              | 2                     | 2                      | 1                                               | 1                                 |                                       |                                       |
|                                |                                   | 15 | 2                              | 1                     | 2                      | 1                                               | 1                                 |                                       |                                       |
|                                | 4137                              | 36 | 2                              | 1                     | 2                      | 1                                               | 1                                 | -0.26                                 | -0.02                                 |
|                                |                                   | 29 | 1                              | 2                     | 1                      | 2                                               | 1                                 |                                       |                                       |
|                                |                                   | 18 | 1                              | 2                     | 2                      | 1                                               | 1                                 |                                       |                                       |
| <sup>4</sup> E <sub>1</sub> '' | 5263                              | 32 | 2                              | 1                     | 2                      | 1                                               | 1                                 | 16.12                                 | 14.50                                 |
|                                |                                   | 31 | 2                              | 1                     | 1                      | 1                                               | 2                                 |                                       |                                       |
|                                |                                   | 29 | 1                              | 2                     | 1                      | 2                                               | 1                                 |                                       |                                       |
|                                | 5520                              | 44 | 1                              | 2                     | 2                      | 1                                               | 1                                 | 14.48                                 | -13.25                                |
|                                |                                   | 29 | 1                              | 2                     | 1                      | 1                                               | 2                                 |                                       |                                       |
|                                |                                   | 17 | 2                              | 1                     | 1                      | 2                                               | 1                                 |                                       |                                       |
| <sup>2</sup> A <sub>1</sub> '  | 20441                             | 41 | 2                              | 2                     | 2                      | 0                                               | 1                                 | 13.24                                 | 0.00                                  |
|                                |                                   | 27 | 2                              | 2                     | 0                      | 2                                               | 1                                 |                                       |                                       |
|                                |                                   | 11 | 2                              | 0                     | 2                      | 2                                               | 1                                 |                                       |                                       |

**Table S51.** Computed NEVPT2 transition energies and state-wise contribution to the axial and rhombic ZFS parameters of [Co(NO<sub>3</sub>)(EtOH)]<sup>+</sup> (**16**).

| NEVPT2 excited states | Multiplicity | NEVPT2 energy (cm <sup>-1</sup> ) | Contribution to D (cm <sup>-1</sup> ) | Contribution to E (cm <sup>-1</sup> ) |
|-----------------------|--------------|-----------------------------------|---------------------------------------|---------------------------------------|
| 0                     | 4            | 0                                 | 0.00                                  | 0.00                                  |
| 1                     | 4            | 4026                              | 1.36                                  | -0.70                                 |
| 2                     | 4            | 4137                              | -0.26                                 | -0.02                                 |
| 3                     | 4            | 5263                              | 16.12                                 | 14.50                                 |
| 4                     | 4            | 5520                              | 14.48                                 | -13.25                                |
| 5                     | 4            | 12728                             | 0.01                                  | -0.01                                 |
| 6                     | 4            | 13122                             | 0.01                                  | 0.00                                  |
| 7                     | 2            | 15852                             | -0.01                                 | -0.01                                 |
| 8                     | 2            | 16191                             | -0.01                                 | 0.01                                  |
| 9                     | 2            | 18320                             | 0.25                                  | 0.00                                  |
| 10                    | 2            | 18390                             | 0.00                                  | 0.00                                  |
| 11                    | 2            | 20441                             | 13.24                                 | 0.00                                  |
| 12                    | 4            | 21282                             | 0.07                                  | 0.07                                  |
| 13                    | 4            | 21544                             | 0.08                                  | -0.08                                 |
| 14                    | 2            | 21784                             | -0.08                                 | 0.06                                  |

|    |   |       |       |       |
|----|---|-------|-------|-------|
| 15 | 2 | 21857 | 0.02  | -0.03 |
| 16 | 2 | 22007 | -1.49 | 1.38  |
| 17 | 2 | 22036 | -1.59 | -1.46 |
| 18 | 2 | 22594 | 0.00  | 0.00  |
| 19 | 4 | 23238 | 0.00  | 0.00  |
| 20 | 2 | 24592 | 0.00  | 0.00  |
| 21 | 2 | 24802 | 0.00  | 0.00  |
| 22 | 2 | 27227 | 0.00  | 0.00  |
| 23 | 2 | 27260 | -0.01 | 0.00  |
| 24 | 2 | 28909 | -0.31 | 0.29  |
| 25 | 2 | 29107 | -0.30 | -0.29 |
| 26 | 2 | 29632 | -0.06 | 0.06  |
| 27 | 2 | 29852 | -0.02 | -0.02 |
| 28 | 2 | 30876 | -0.02 | 0.01  |
| 29 | 2 | 31052 | -0.03 | -0.04 |
| 30 | 2 | 31725 | 1.44  | 0.00  |
| 31 | 2 | 32228 | 0.01  | 0.00  |
| 32 | 2 | 32268 | 0.01  | 0.00  |
| 33 | 2 | 33198 | 0.00  | 0.00  |
| 34 | 2 | 33436 | -0.03 | -0.03 |
| 35 | 2 | 33489 | -0.03 | 0.03  |
| 36 | 2 | 34636 | -0.55 | -0.55 |
| 37 | 2 | 34969 | -0.57 | 0.57  |
| 38 | 2 | 42821 | 0.00  | 0.00  |
| 39 | 2 | 42827 | 0.00  | 0.00  |
| 40 | 2 | 43560 | -0.19 | -0.18 |
| 41 | 2 | 43627 | -0.19 | 0.18  |
| 42 | 2 | 43971 | -0.01 | 0.00  |
| 43 | 2 | 44054 | 0.00  | 0.00  |
| 44 | 2 | 44316 | 0.00  | 0.00  |
| 45 | 2 | 64124 | 0.00  | 0.00  |
| 46 | 2 | 64129 | 0.00  | 0.00  |
| 47 | 2 | 64653 | 0.00  | 0.00  |
| 48 | 2 | 64708 | 0.00  | 0.00  |
| 49 | 2 | 65654 | 0.21  | 0.00  |

## References

1. M. Dey, S. Dutta, B. Sarma, R. C. Deka and N. Gogoi, *Chem. Commun.*, 2016, **52**, 753-756.
2. L. Chen, S.-Y. Chen, Y.-C. Sun, Y.-M. Guo, L. Yu, X.-T. Chen, Z. Wang, Z. Ouyang, Y. Song and Z.-L. Xue, *Dalton Trans.*, 2015, **44**, 11482-11490.
